# Supplementary material for: Lewis acid/CpRu dual catalysis in the enantioselective decarboxylative allylation of ketone enolates
Source: Royal Society of Chemistry journal article supplement (doi:10.1039/b910475e), 2009-01-01
Supplement: b910475e.pdf [file b910475e.pdf]

# Lewis Acid / CpRu Dual-Catalysis in the Enantioselective Decarboxylative Allylation of Ketone Enolates

David Linder, Martina Austeri and Jérôme Lacour\*

Département de Chimie Organique, Université de Genève,

Quai Ernest Ansermet 30, 1211 Genève 4, Switzerland.

E-mail: jerome.lacour@unige.ch

## Supporting Information

### General procedure for the synthesis of cinnamyl acetoacetates of type **3** and **7**.

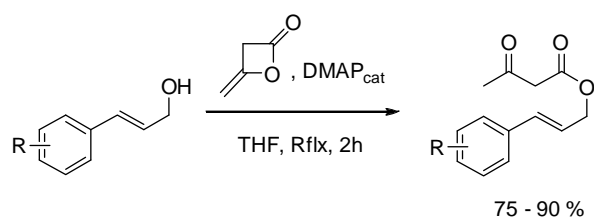

$\beta$ -ketoesters **3a**, **3c**, **3d**, **3f** and **3g** were prepared by DMAP-catalyzed addition of the corresponding allylic alcohols to diketene.<sup>1</sup>

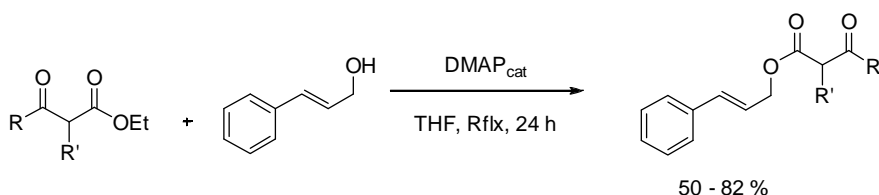

$\beta$ -ketoesters **3b**, **3e** and **3h** were prepared by DMAP catalyzed transesterification of the corresponding ethylketoesters. Compounds **3a** to **3h** have spectral characteristics corresponding to those described already in the literature.<sup>2</sup>

Branched  $\beta$ -ketoester **7** was synthesized as follows:

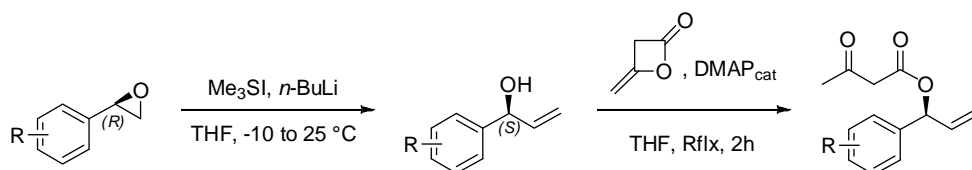

### **CpRu-catalyzed Carroll rearrangement – dual-catalysis procedure.**

Typical procedure. In a 2 mL screw-cap vial equipped with a magnetic stirring bar, [CpRu( $\eta^6$ -naphthalene)][PF<sub>6</sub>] **1** (5.3 mg, 0.012 mmol, 2 mol%) and ligand **2** (8.1 mg, 0.033 mmol, 4.4 mol%) were dissolved in 0.6 mL dry THF. The vial was flushed with argon and capped. After a 1h heating at 60 °C, the vial was cooled to room temperature (~ 25 °C) and allyl  $\beta$ -ketoester **3a** (150 mg, 0.6 mmol) was added in one portion followed by [Mg(OTf)<sub>2</sub>] (2.0 mg, 0.006 mmol, 1 mol%) and the vial was flushed again with argon and stirred at room temperature for 24 h. The cooled reaction mixture was diluted with 1.5 mL of a mixture of ether and pentane (60 : 40). After precipitation, the metal salts were filtered off on a short SiO<sub>2</sub> column (0.5 cm x 4 cm, elution ether : pentane, 60 : 40); the solvents being then evaporated under reduced pressure to afford the crude reaction mixture (**4a** + **5a**) as a pale yellow oil which was analysed without further purification. The sign of the optical rotation was measured from a solution of crude product (~10 mg) in 1 mL CDCl<sub>3</sub>.

### **Reference**

- 1 I. Collado, C. Pedregal, A. Mazon, J. F. Espinosa, J. Blanco-Urgoiti, D. D. Schoepp, R. A. Wright, B. G. Johnson and A. E. Kingston, *J. Med. Chem.*, 2002, **45**, 3619.
- 2 E. C. Burger and J. A. Tunge, *Org. Lett.*, 2004, **6**, 2603.

<sup>1</sup>H NMR spectrum of **1** (300 MHz, Acetone-d<sub>6</sub>)

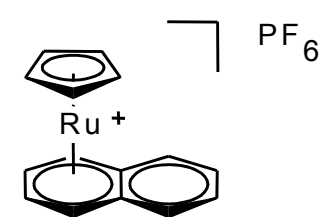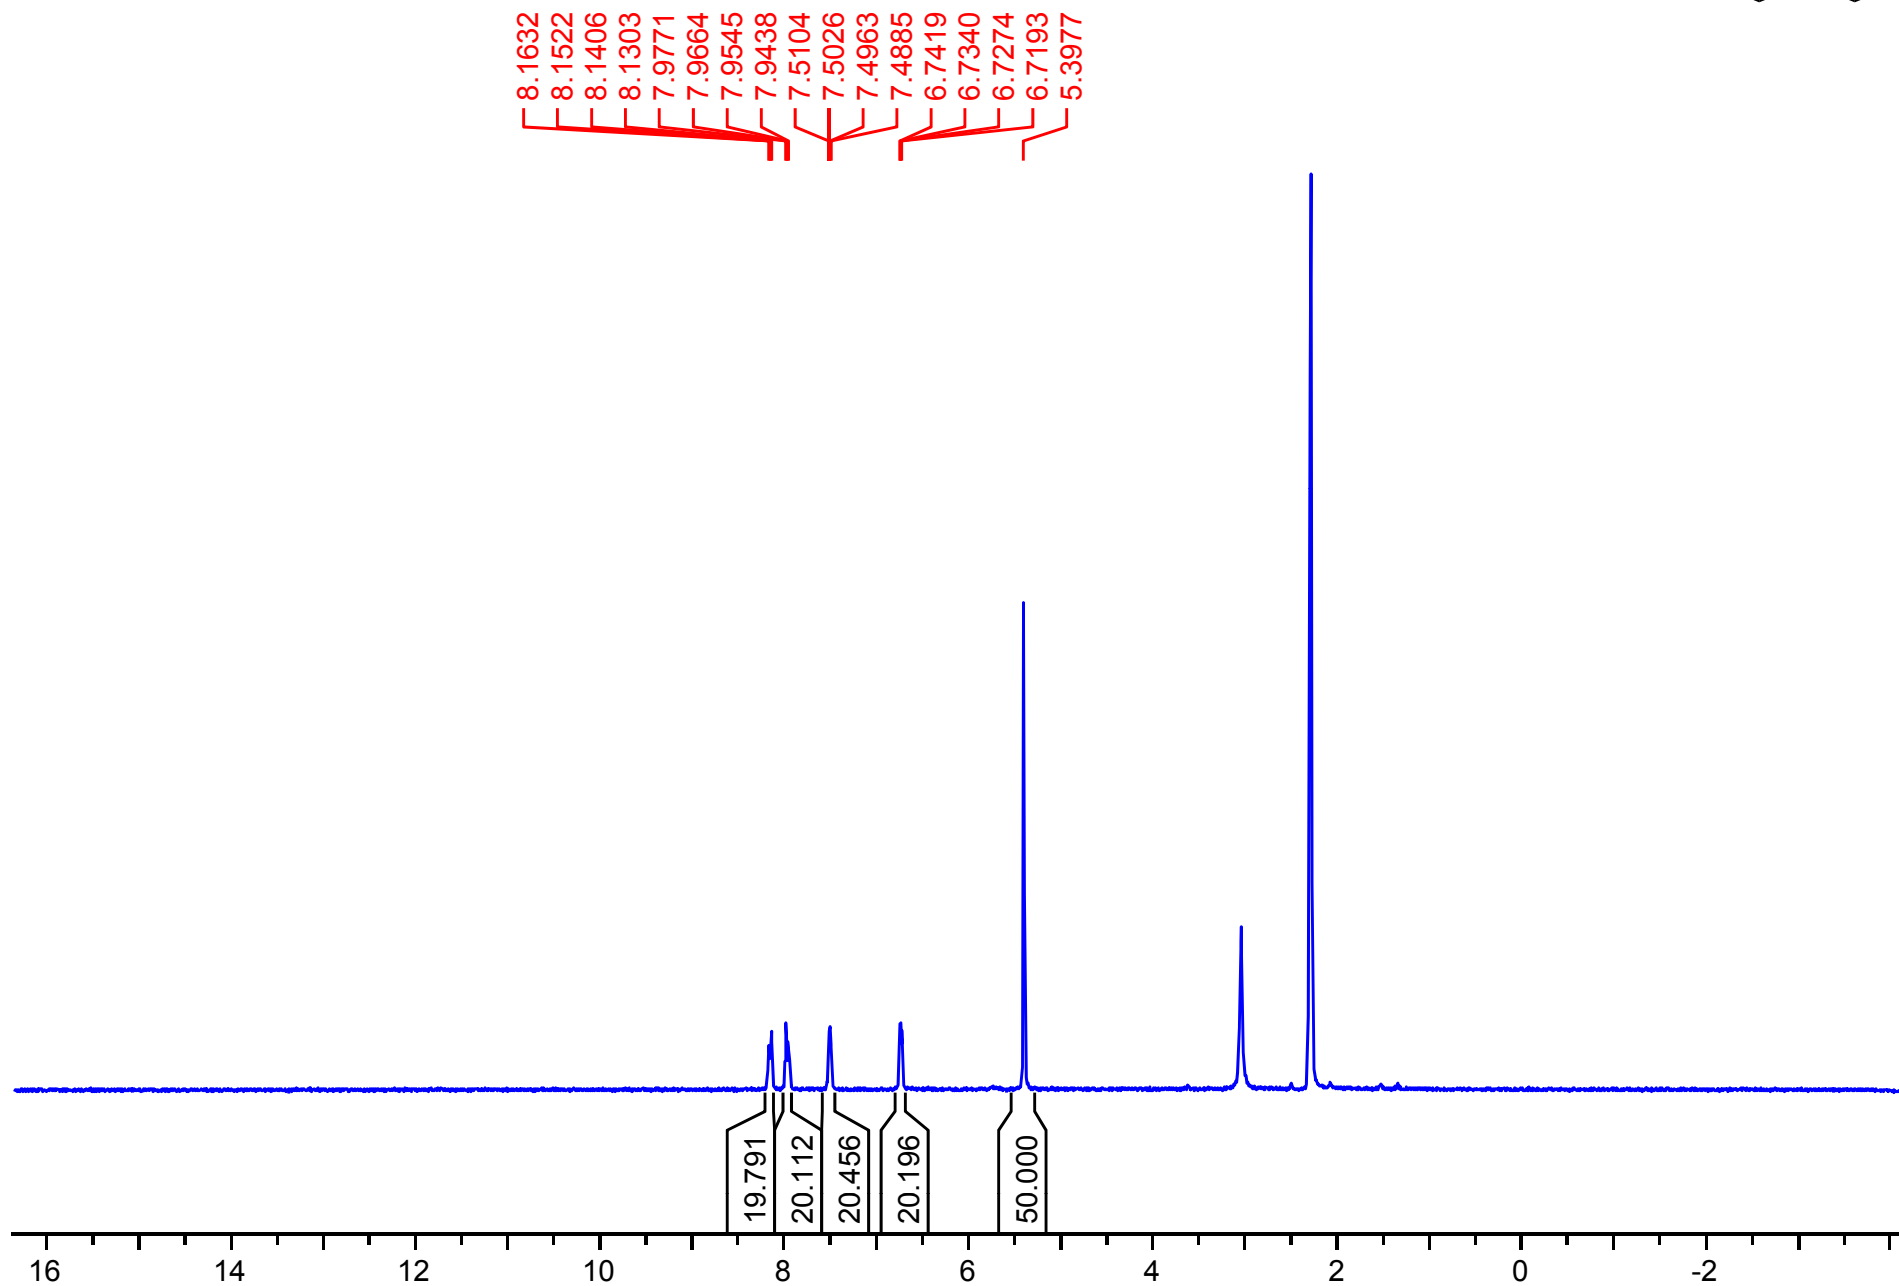

<sup>1</sup>H NMR spectrum of **2** (300 MHz, CD<sub>2</sub>Cl<sub>2</sub>)

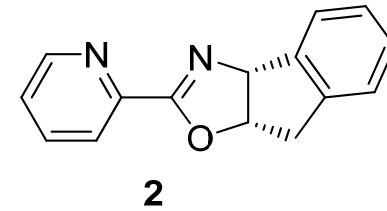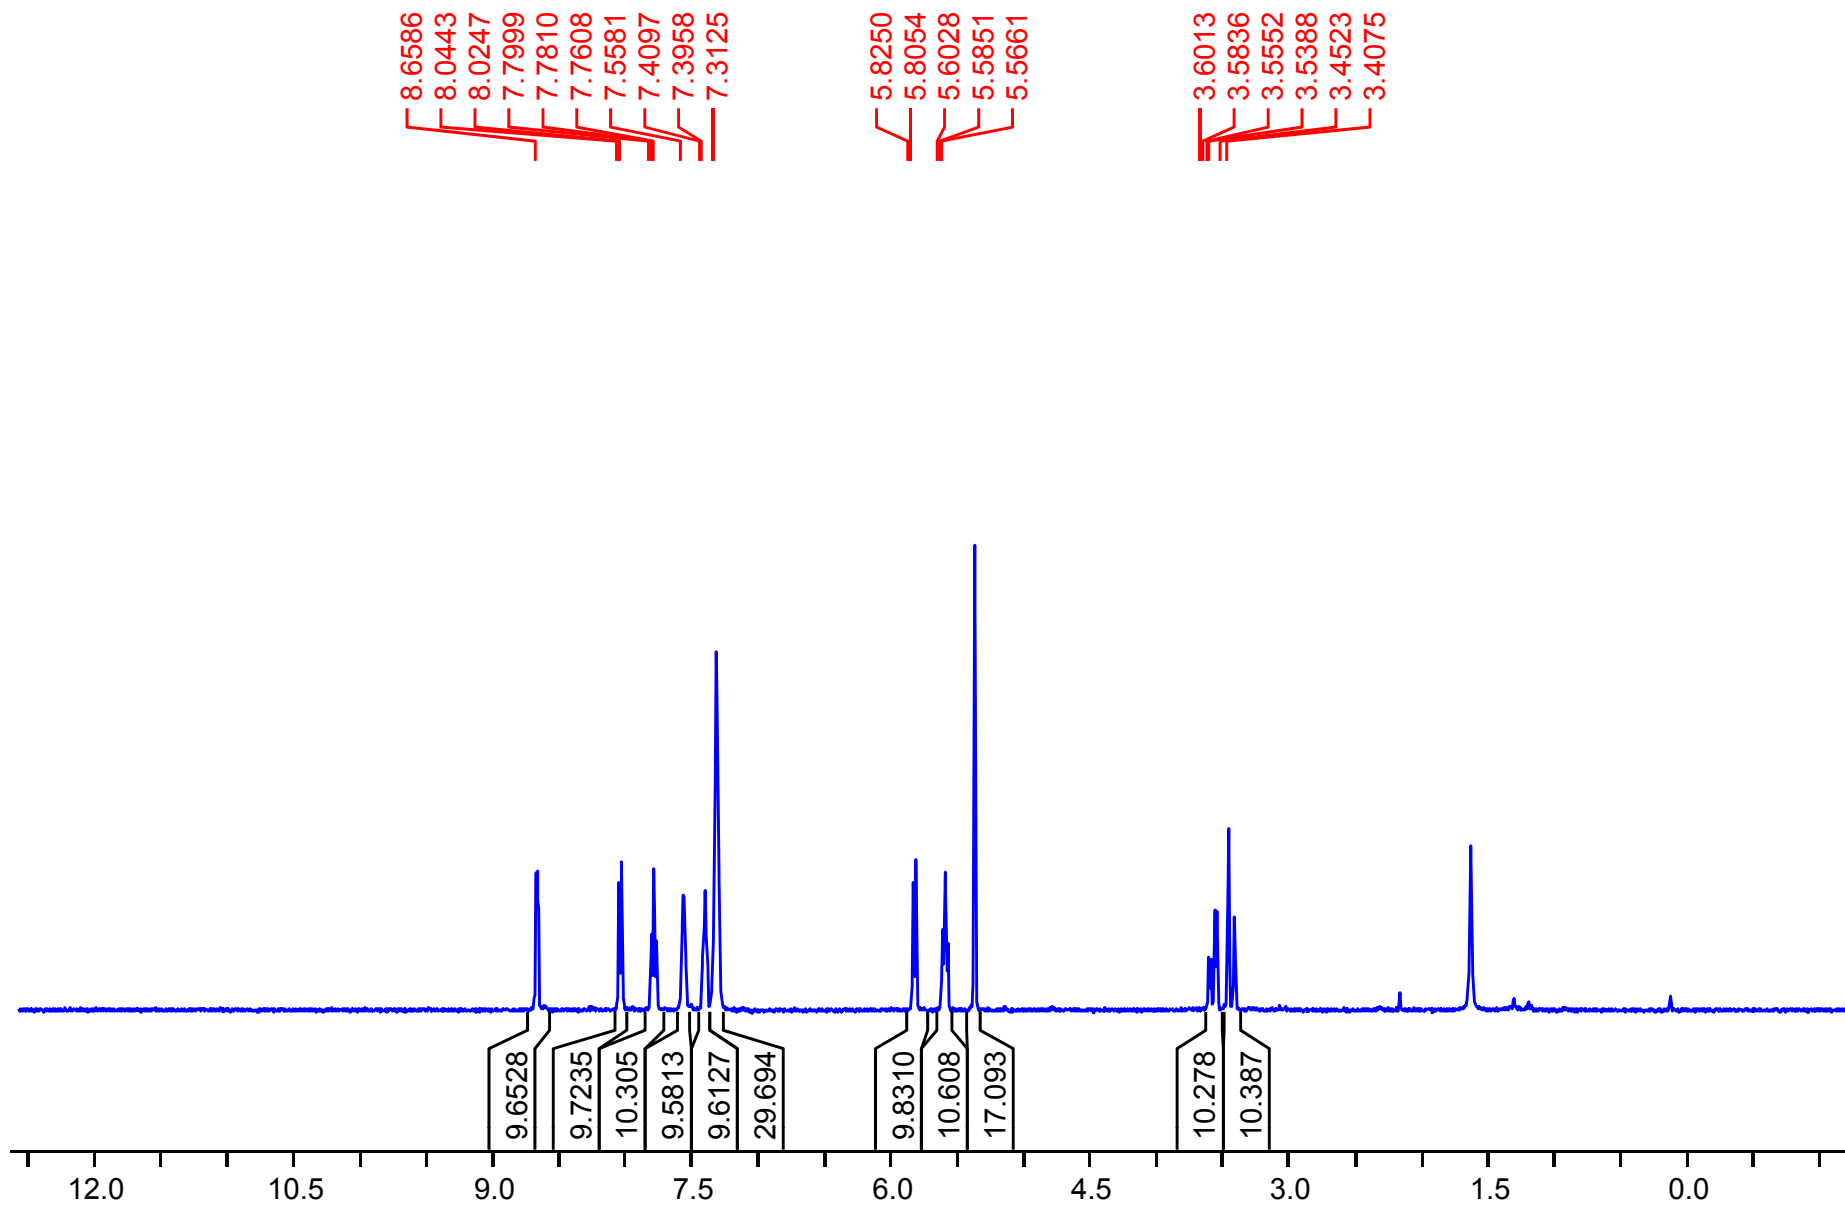

$^1\text{H}$  NMR spectrum of **3a** (300 MHz,  $\text{CDCl}_3$ )

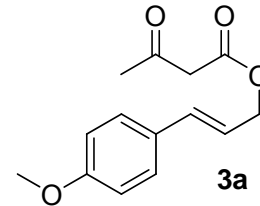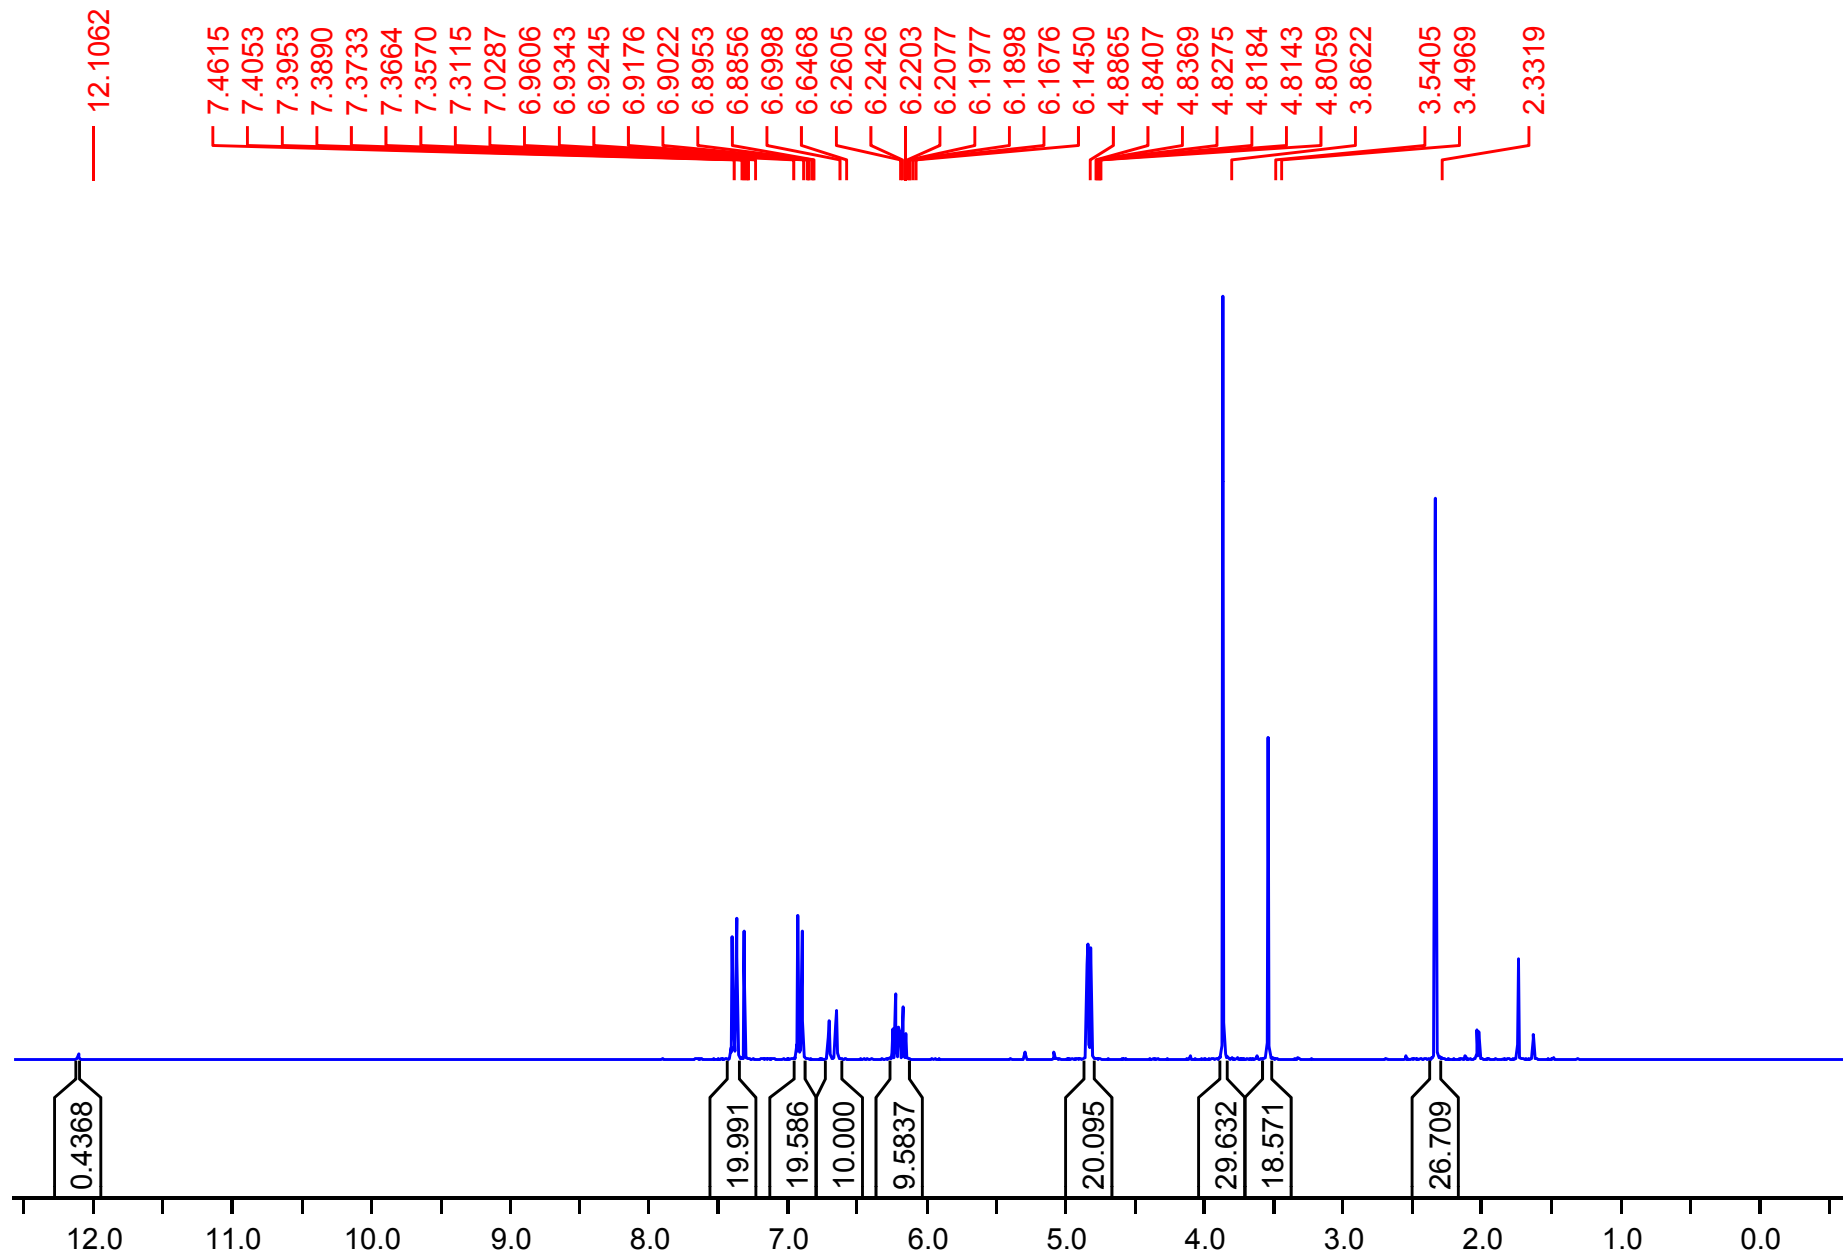

<sup>1</sup>H NMR spectrum of **3b** (400 MHz, CDCl<sub>3</sub>)

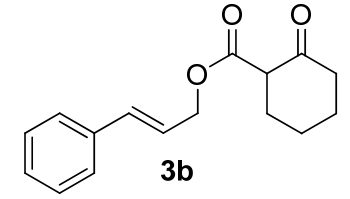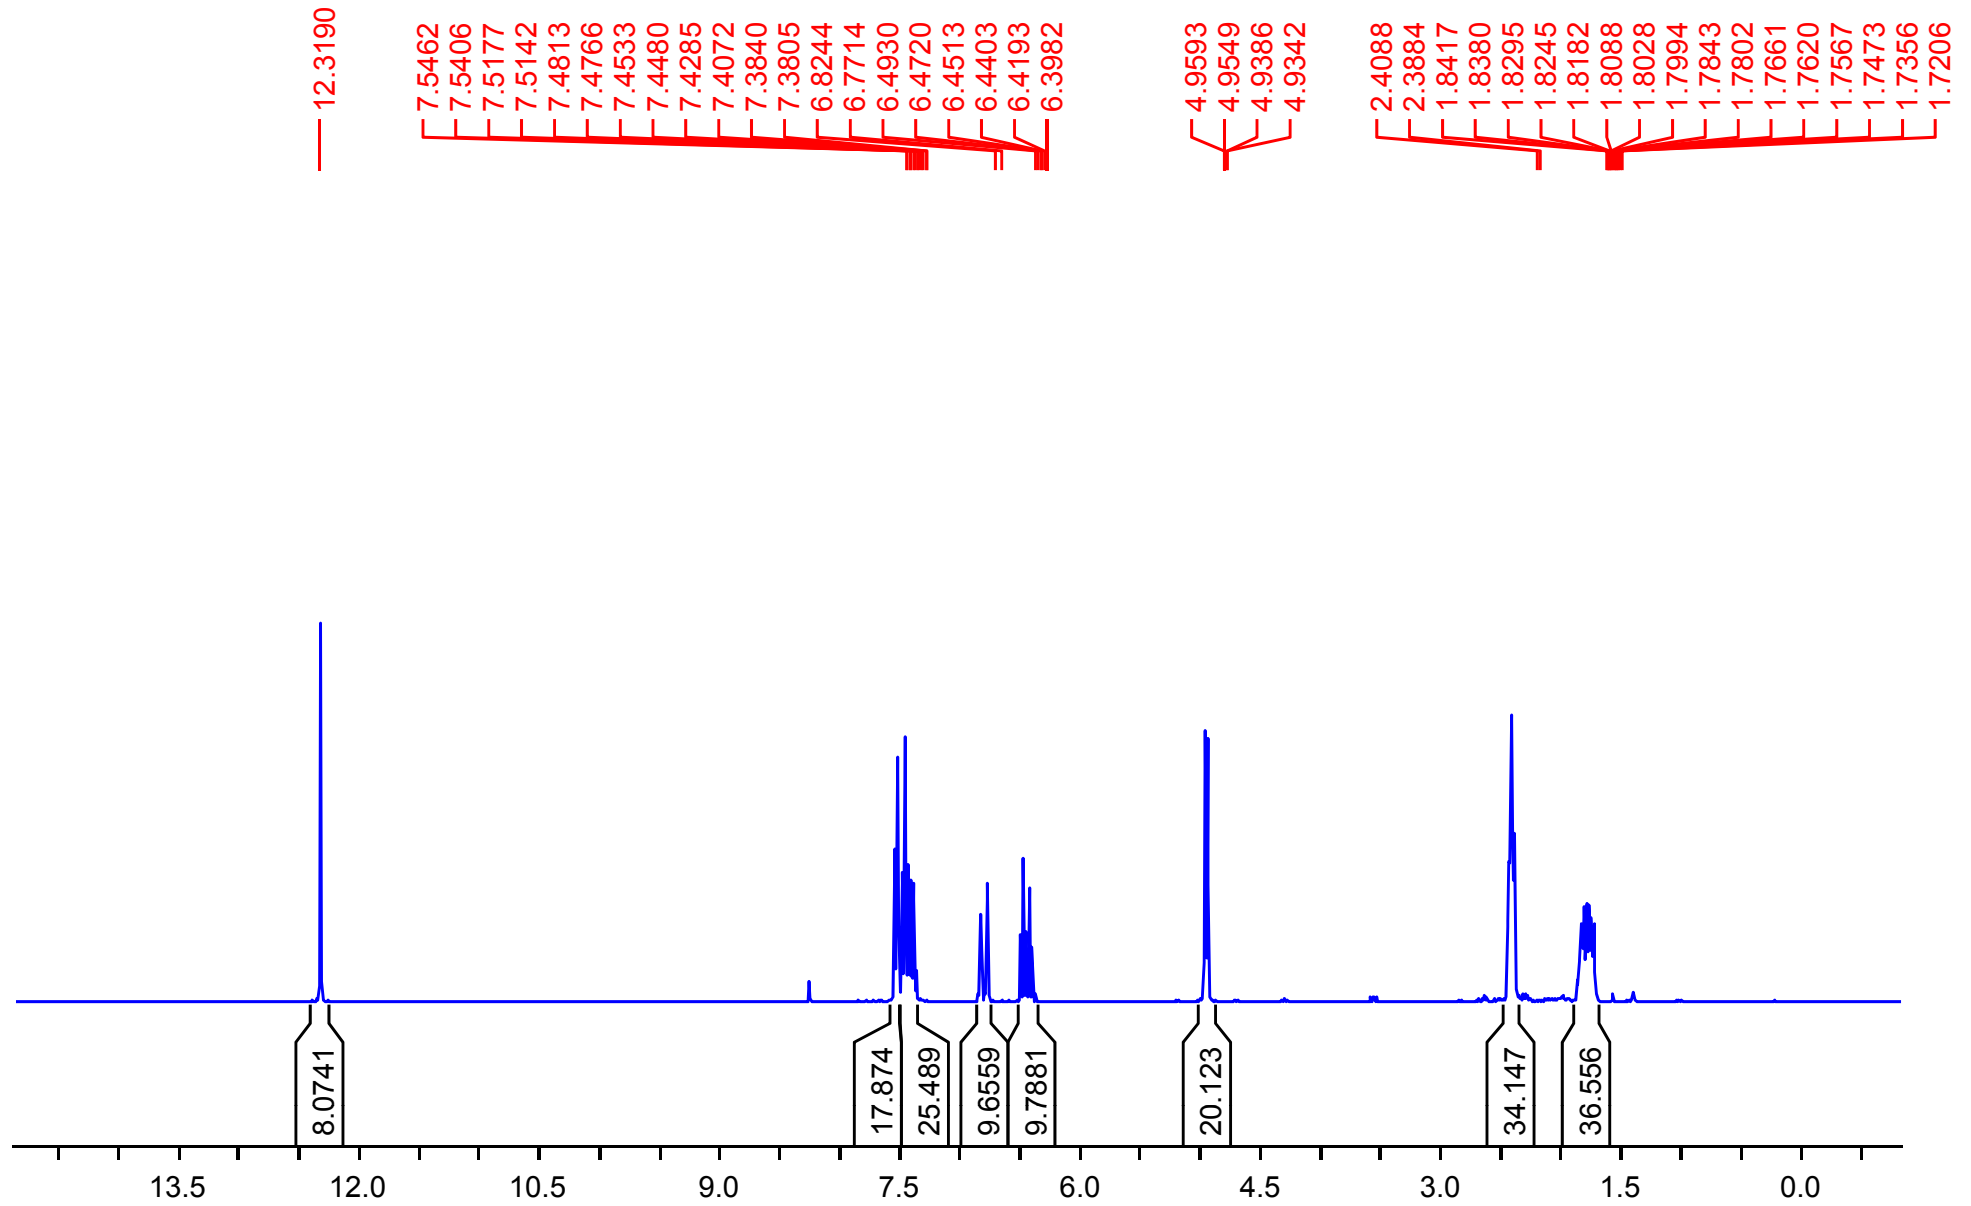

<sup>1</sup>H NMR spectrum of **3c** (400 MHz, CDCl<sub>3</sub>)

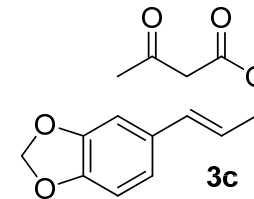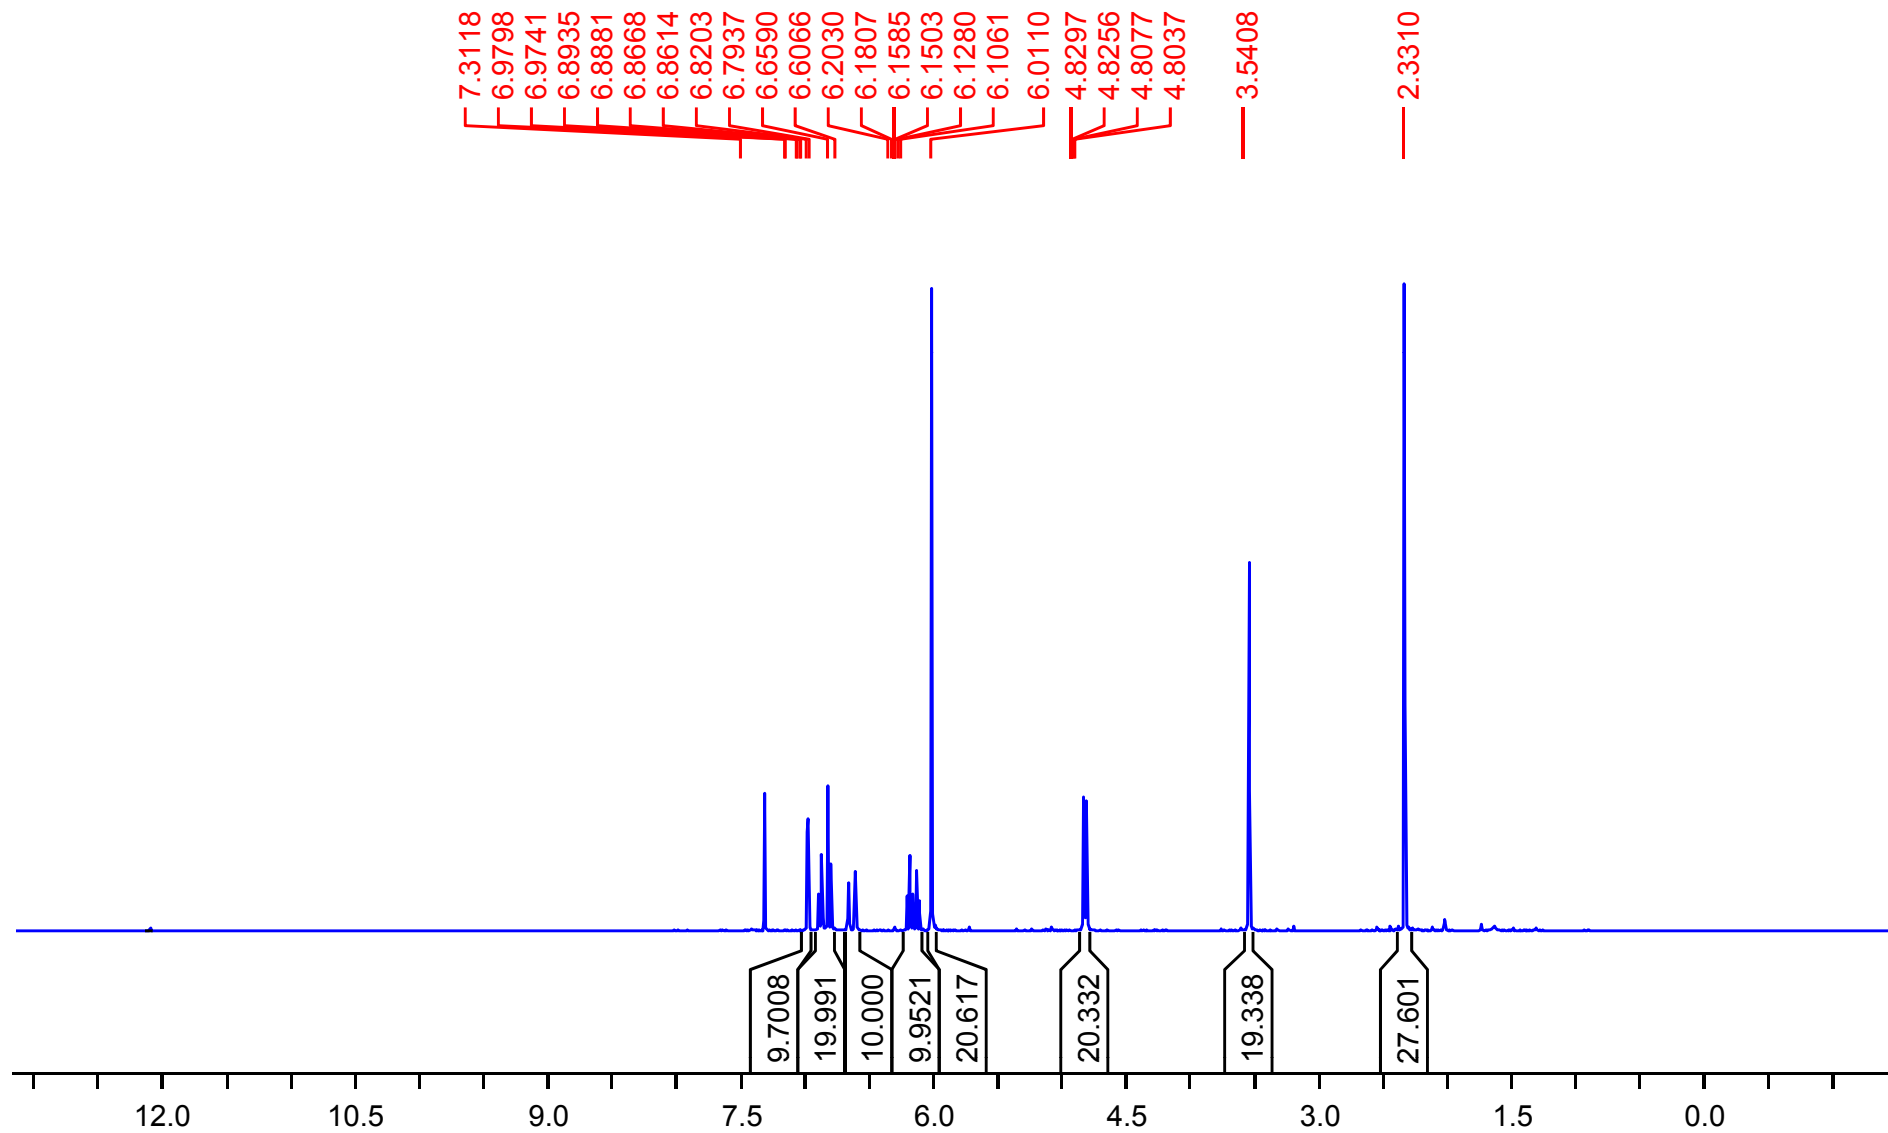

<sup>1</sup>H NMR spectrum of **3d** (400 MHz, CDCl<sub>3</sub>)

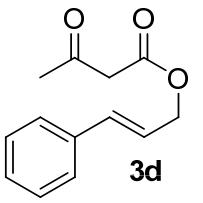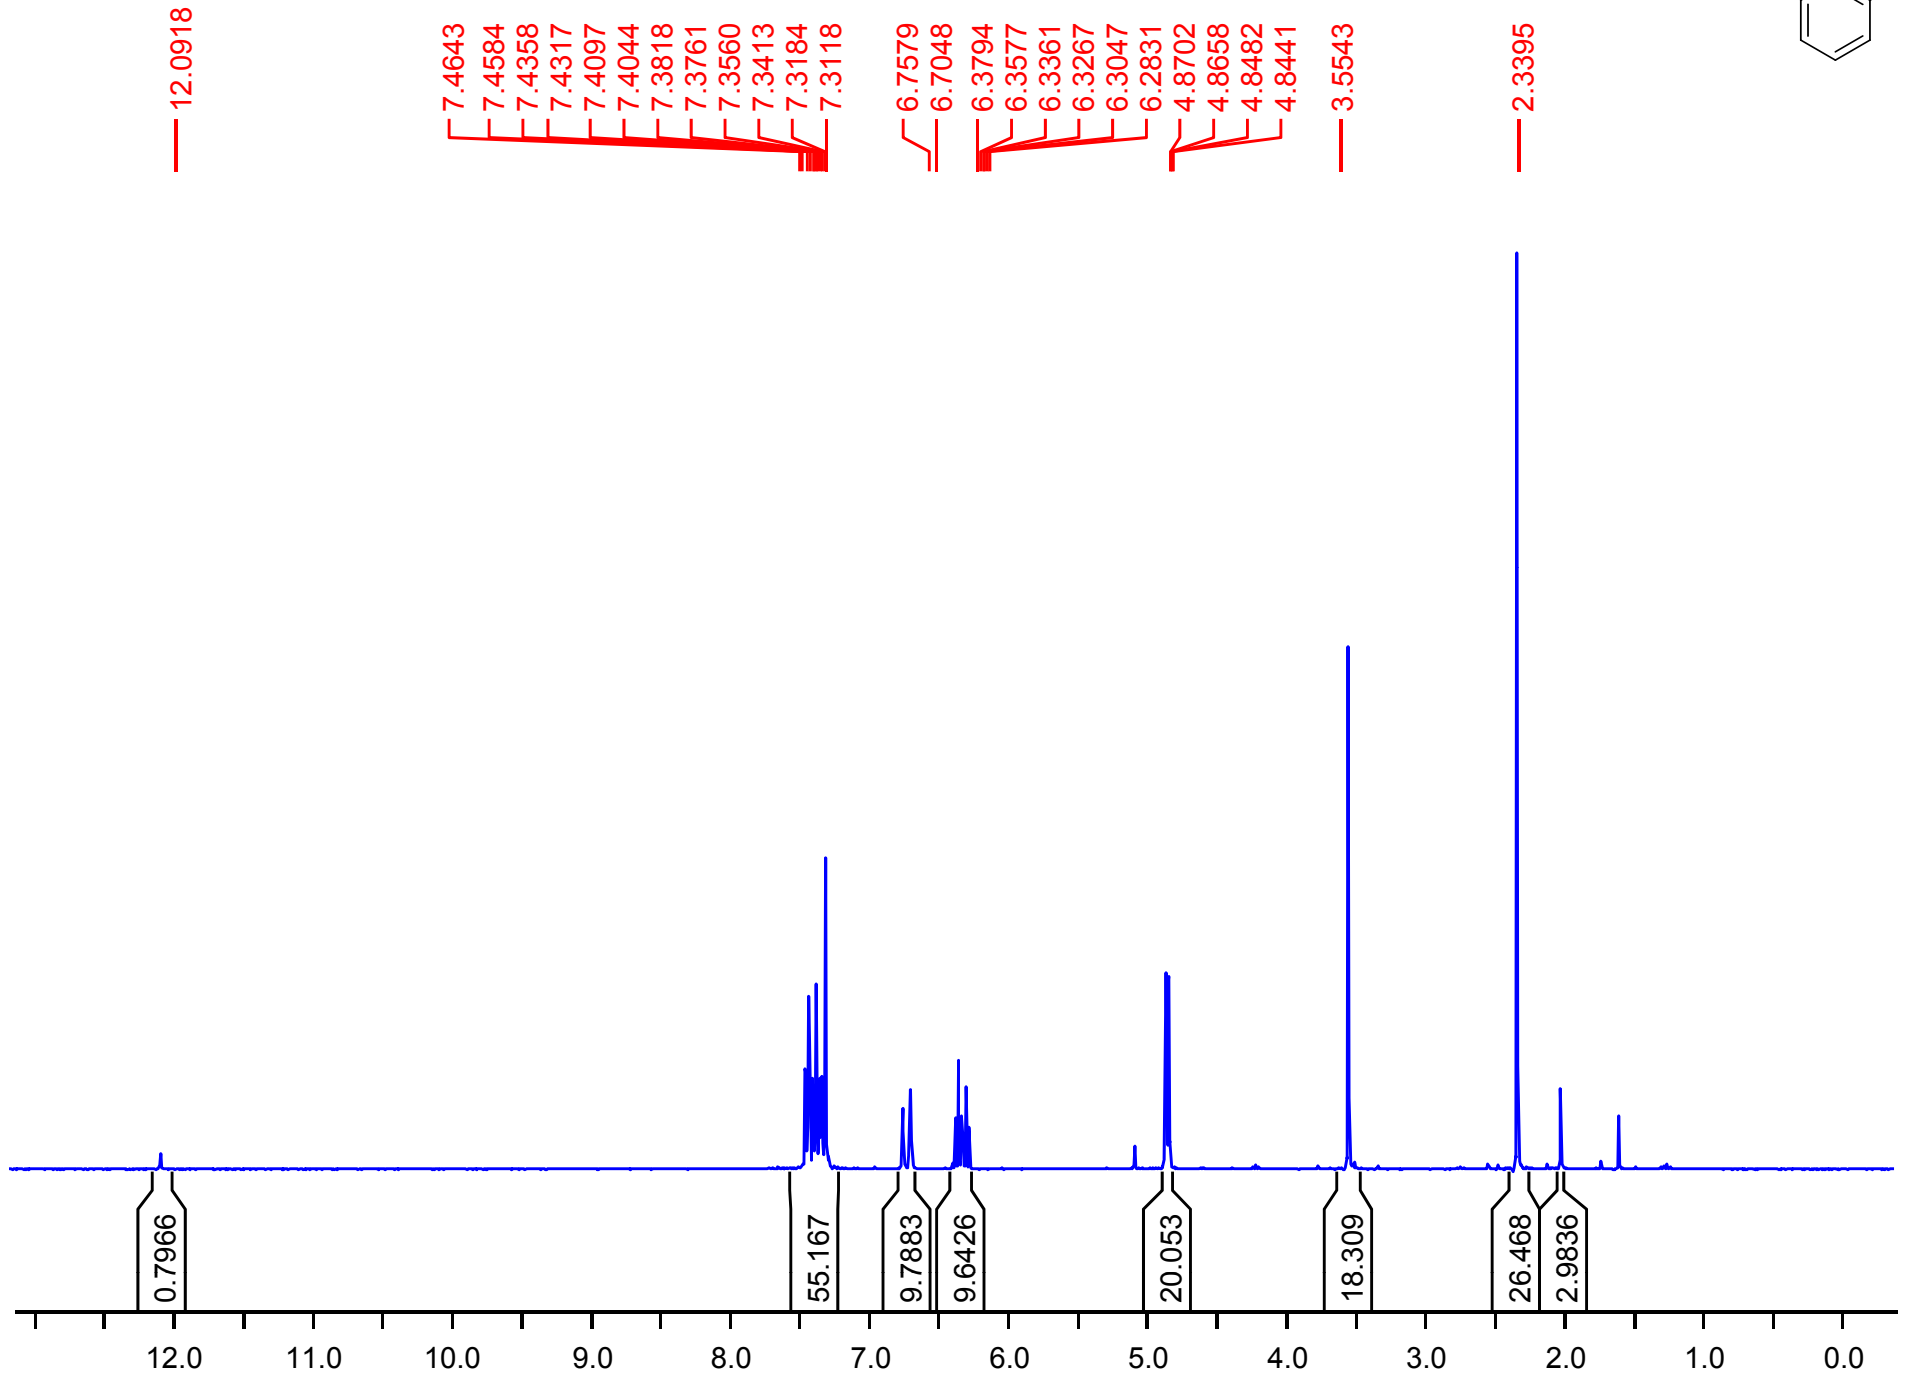



<sup>1</sup>H NMR spectrum of **3e** (400 MHz, CDCl<sub>3</sub>)

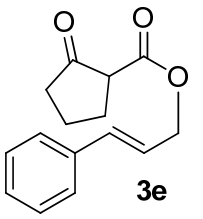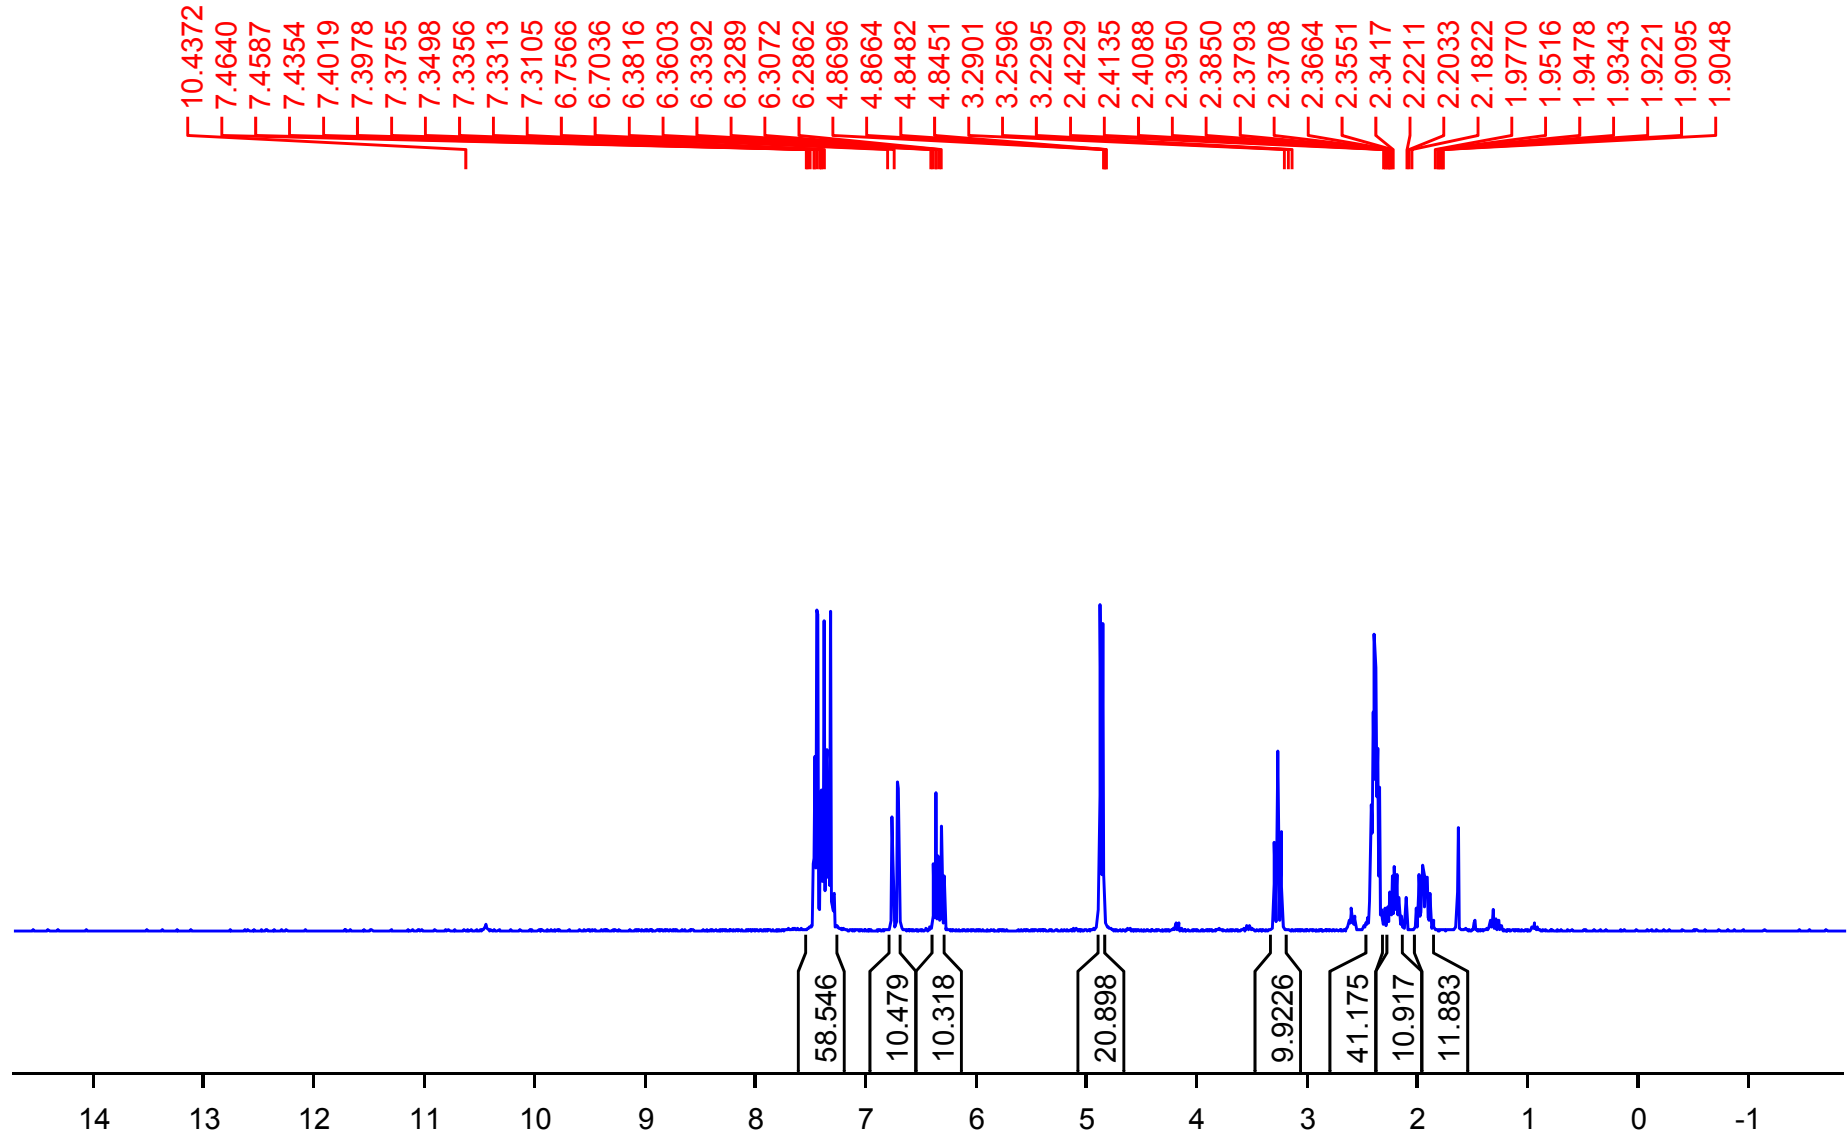

<sup>1</sup>H NMR spectrum of **3f** (400 MHz, CDCl<sub>3</sub>)

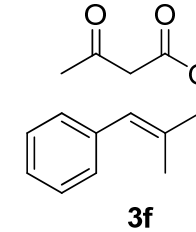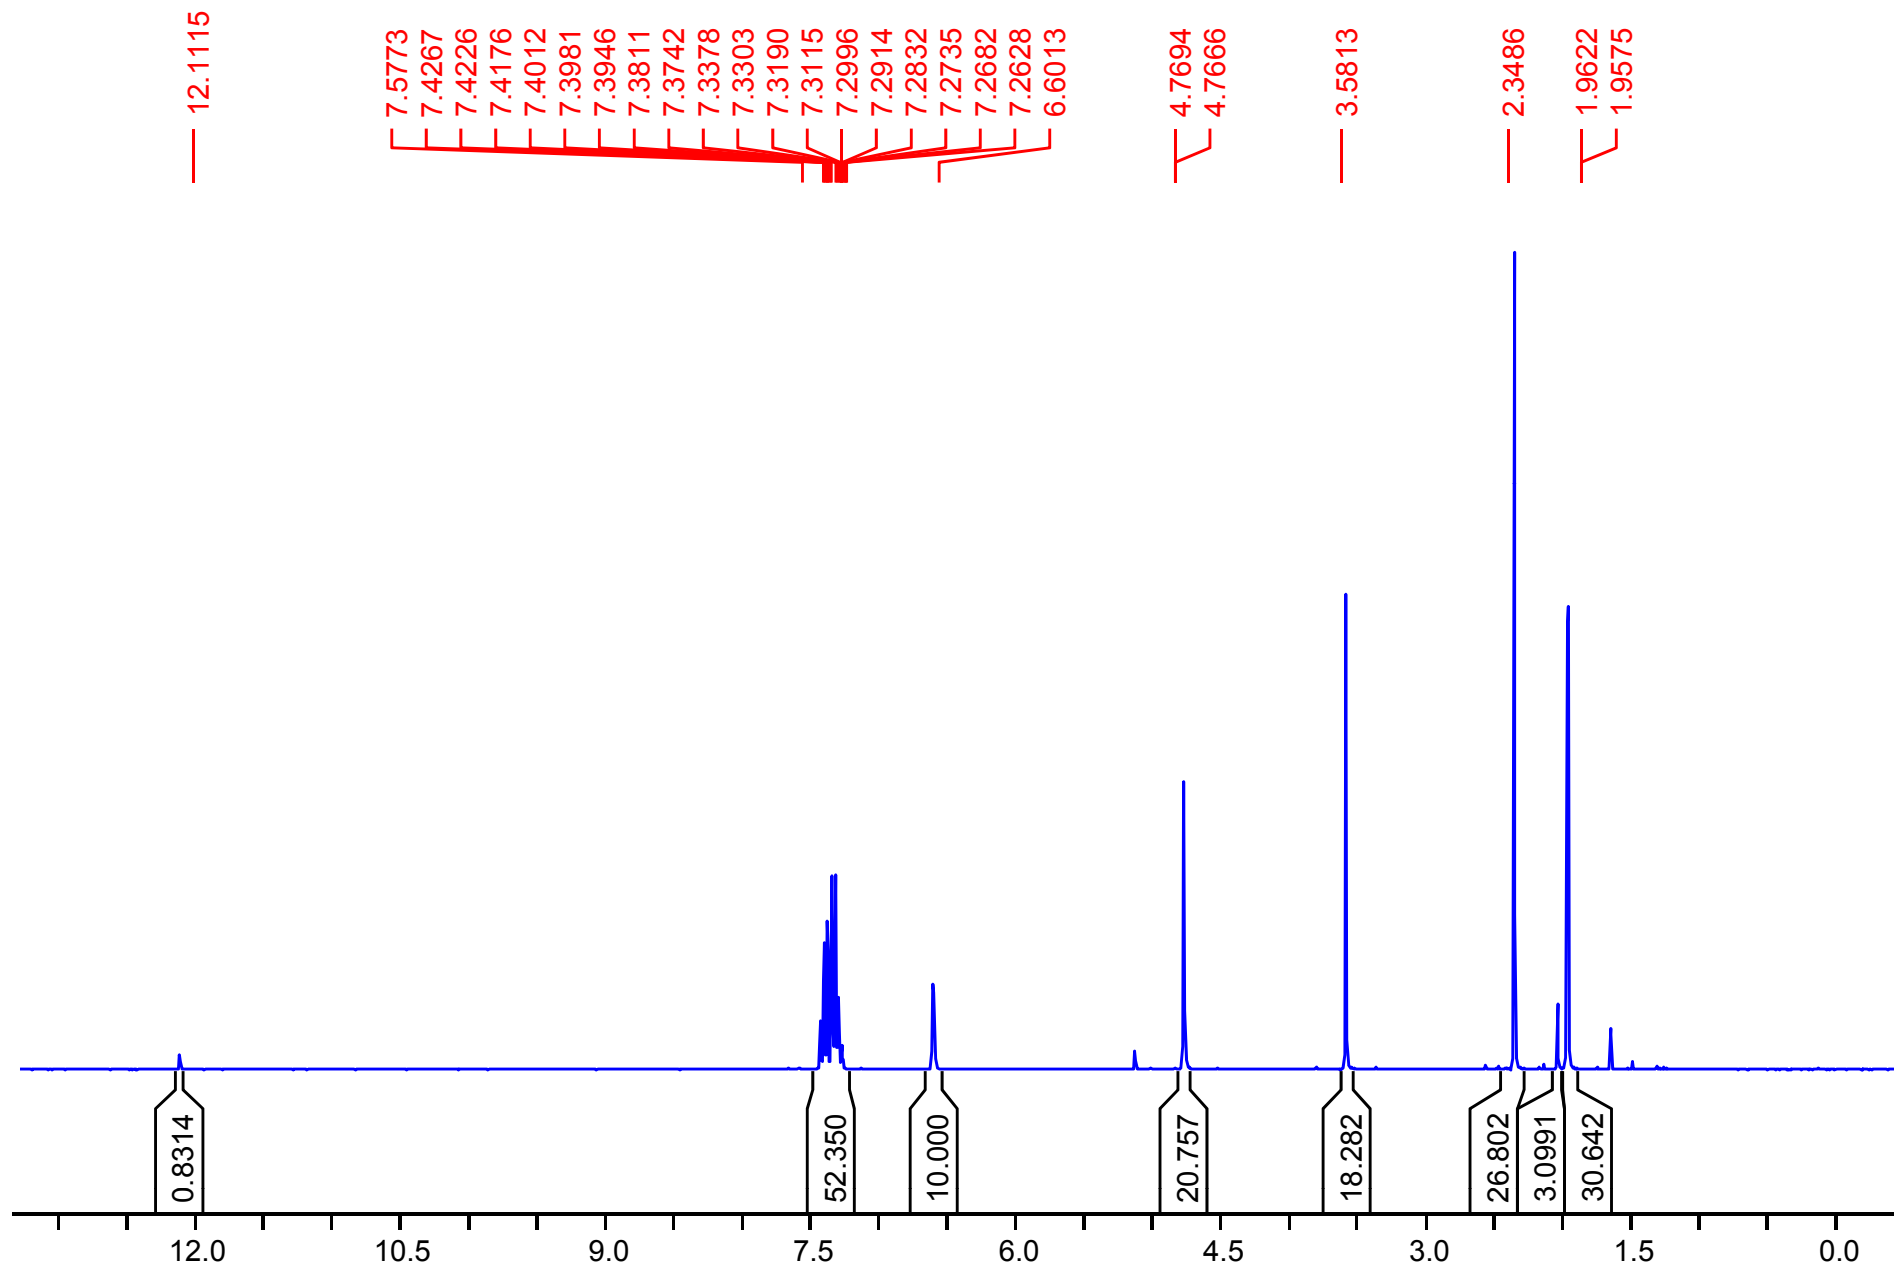

<sup>1</sup>H NMR spectrum of **3g** (300 MHz, CDCl<sub>3</sub>)

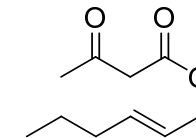

**3g**

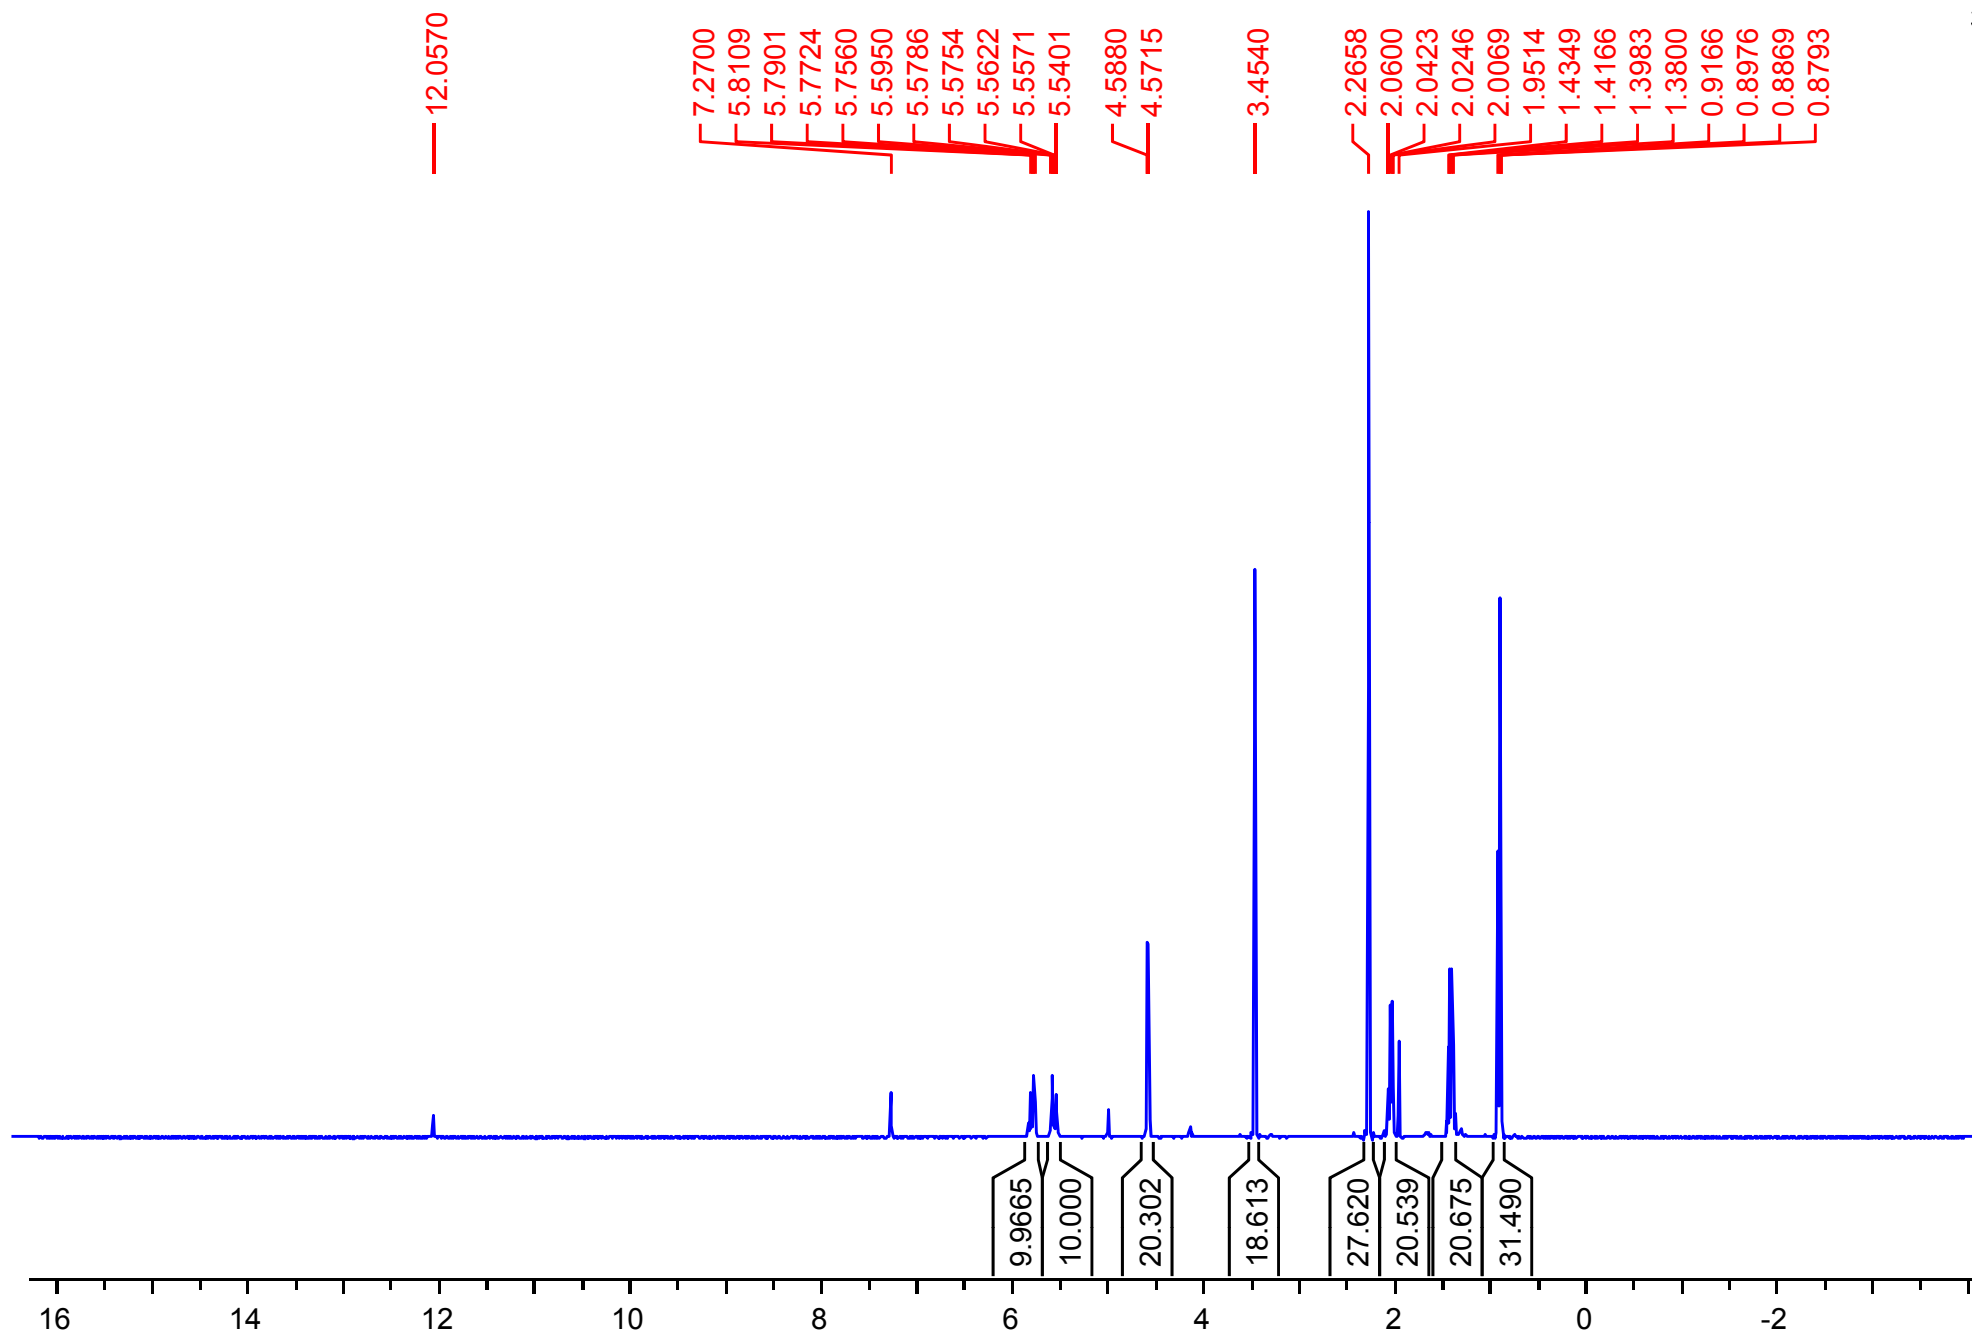

<sup>1</sup>H NMR spectrum of **3h** (400 MHz, CDCl<sub>3</sub>)

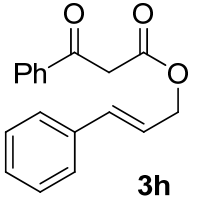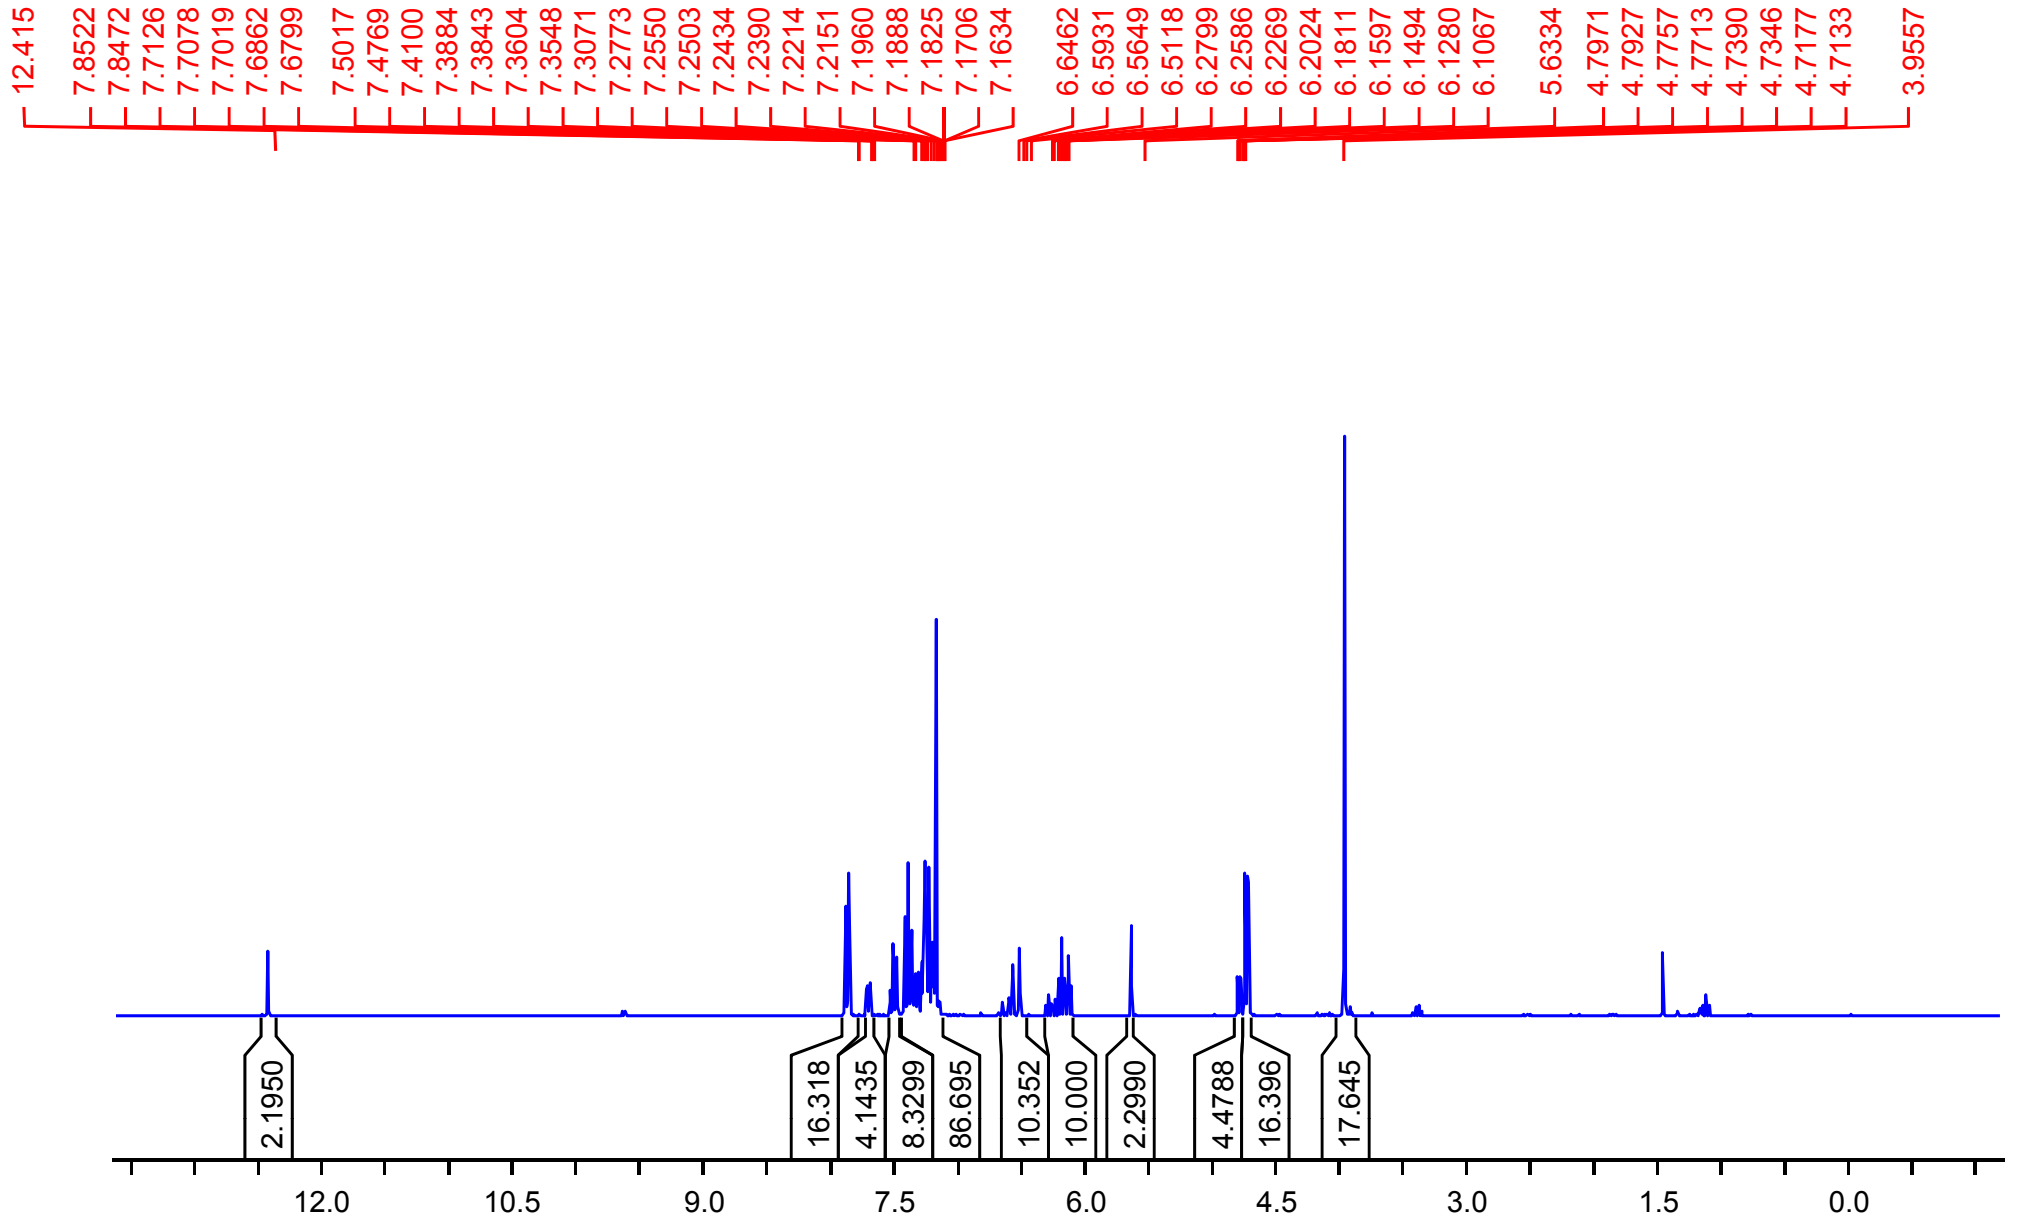

<sup>1</sup>H NMR spectrum of **6** (500 MHz, CDCl<sub>3</sub>)

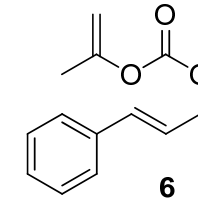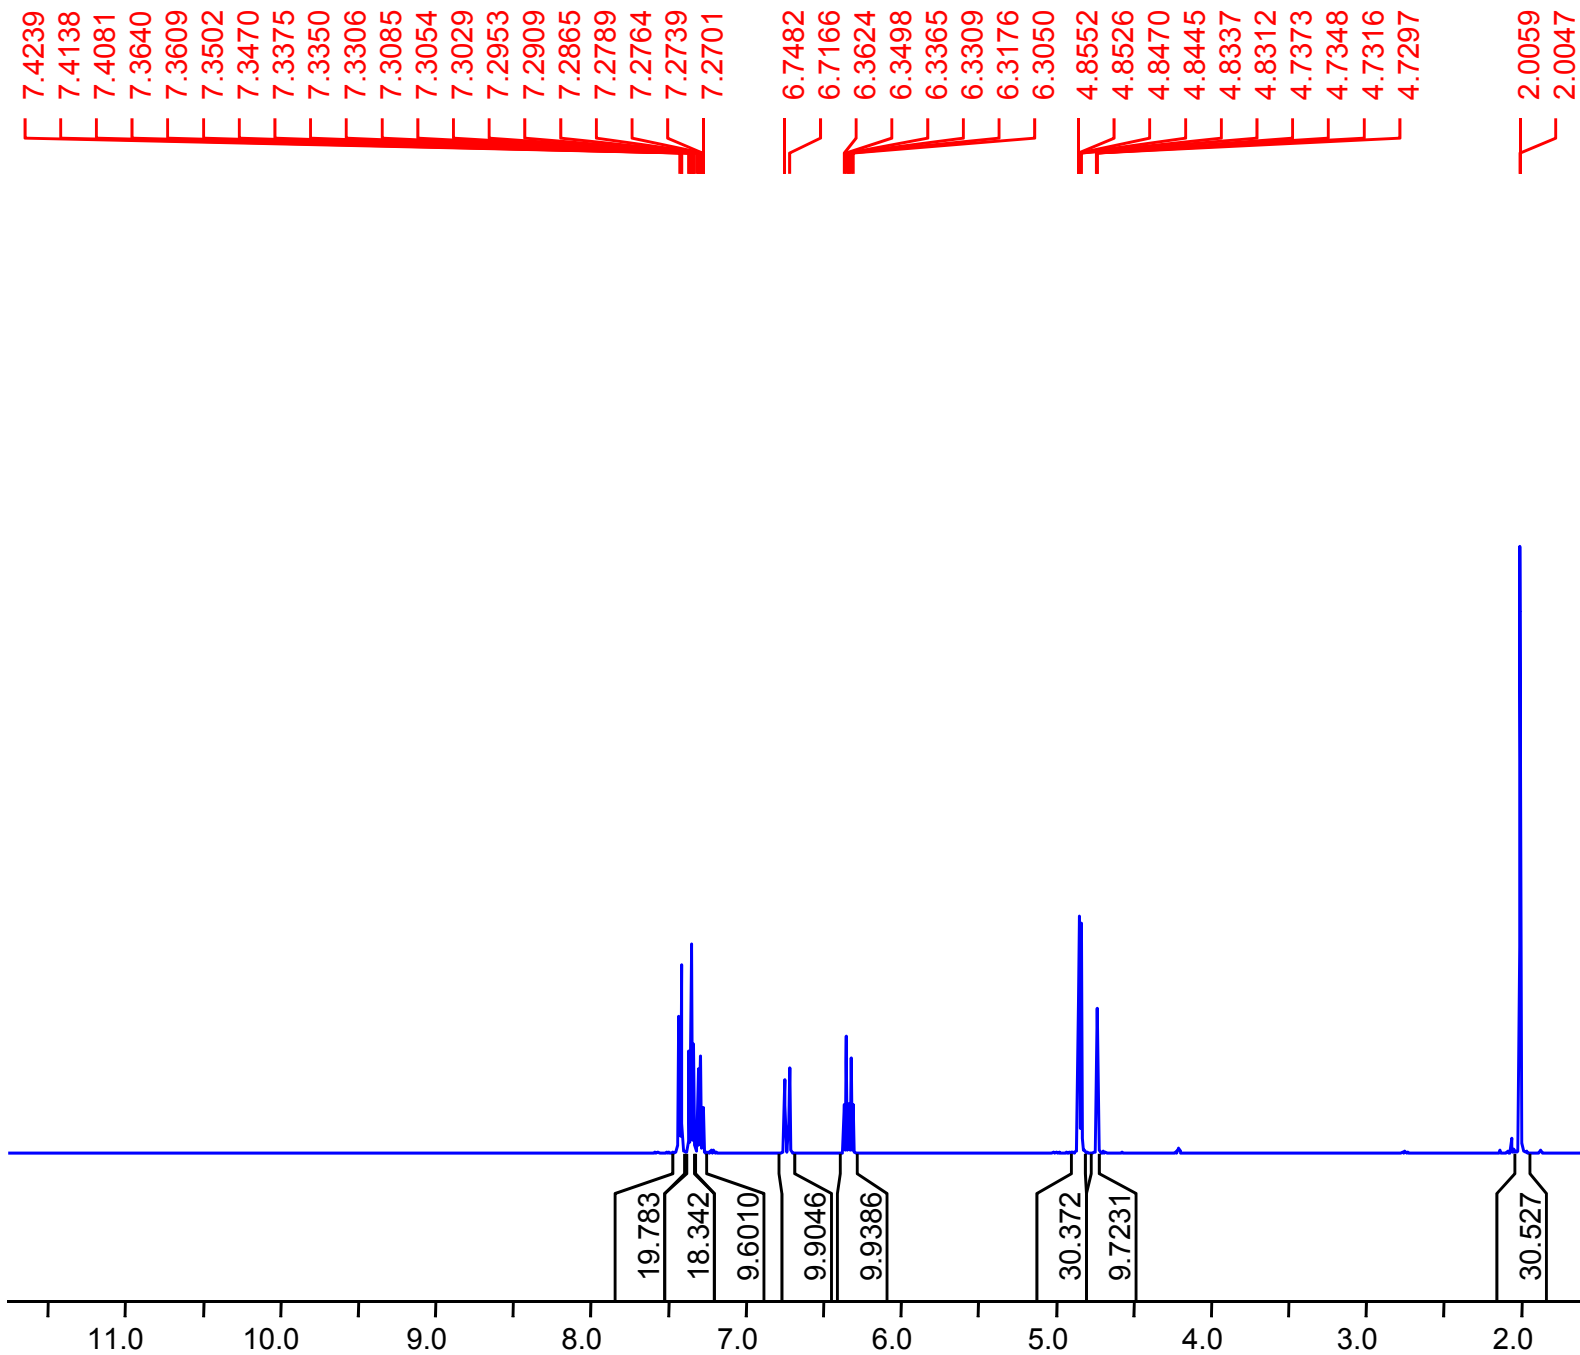

<sup>13</sup>C NMR spectrum of **6** (125 MHz, CDCl<sub>3</sub>)

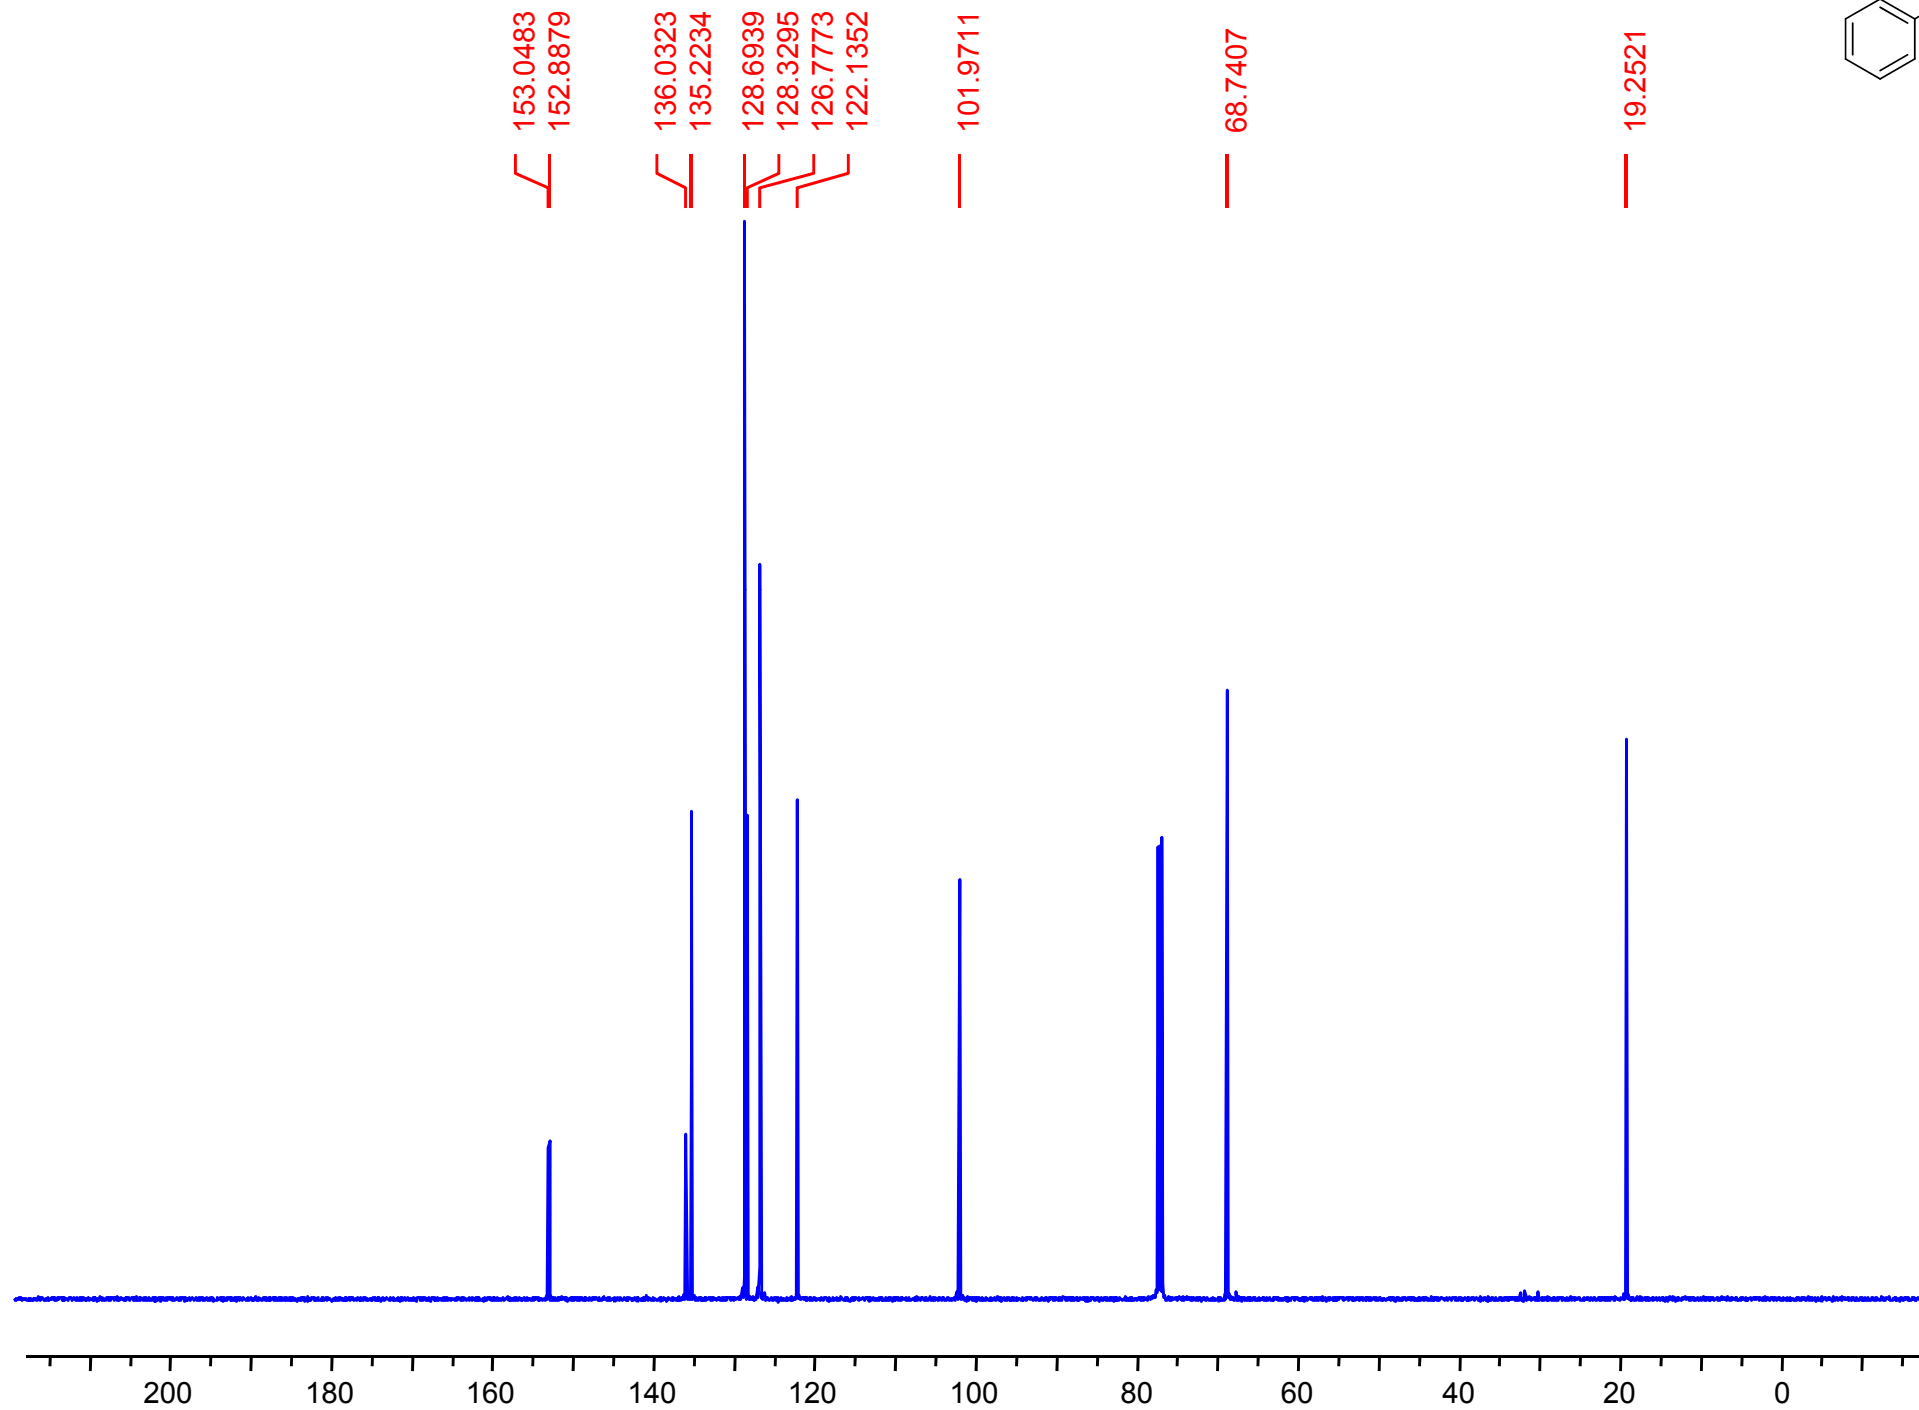

IR spectrum of **6** (Neat)

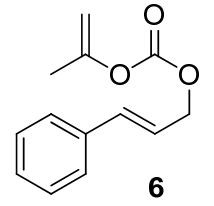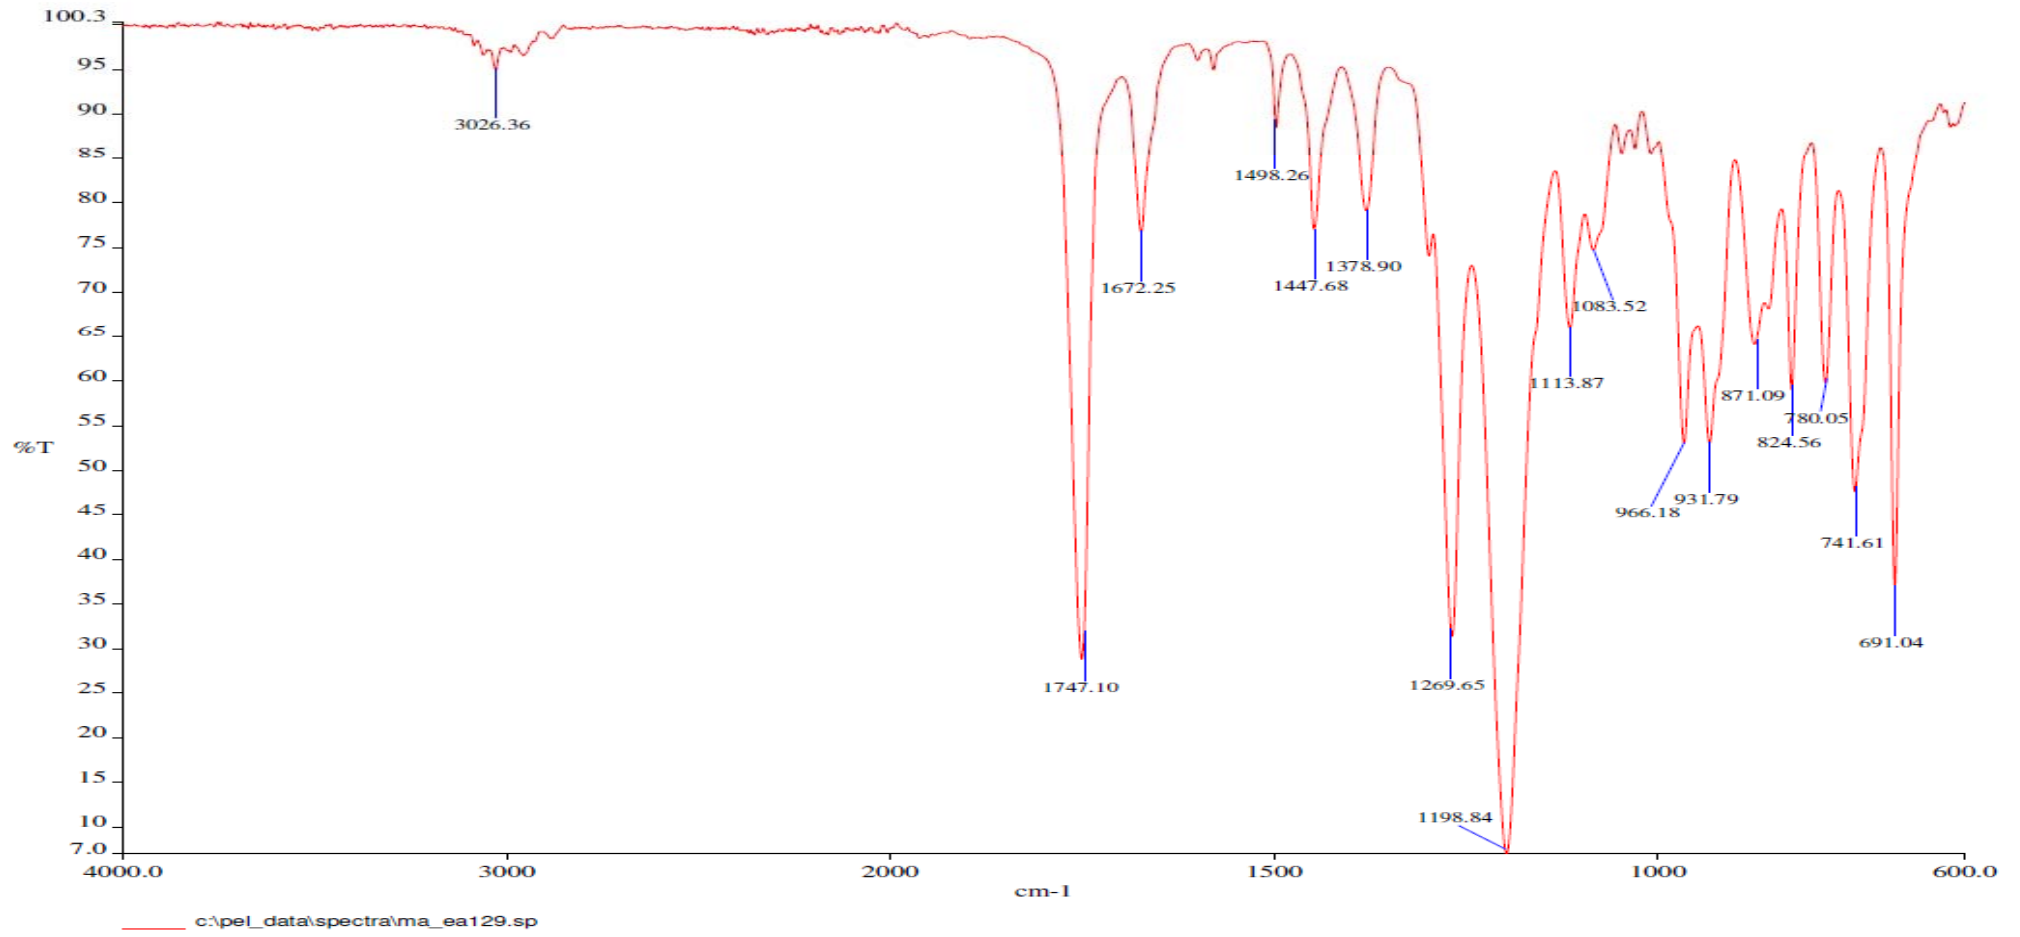

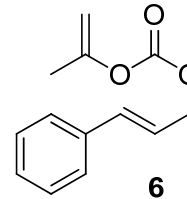

UNIVERSITY OF GENEVA

Faculty of Sciences

Sciences Mass Spectrometry

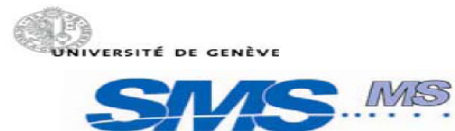

Sample name: EA129

Sample number: 0354

Operator: Eliane Sandmeier

Principal investigator: Prof. G. Hopfgartner

Date of reception: 10/02/09

Date of analysis: 10/02/09

Instrument: VG 7070E

Ionisation mode: EI - LR

Mass spectrum of the sample:

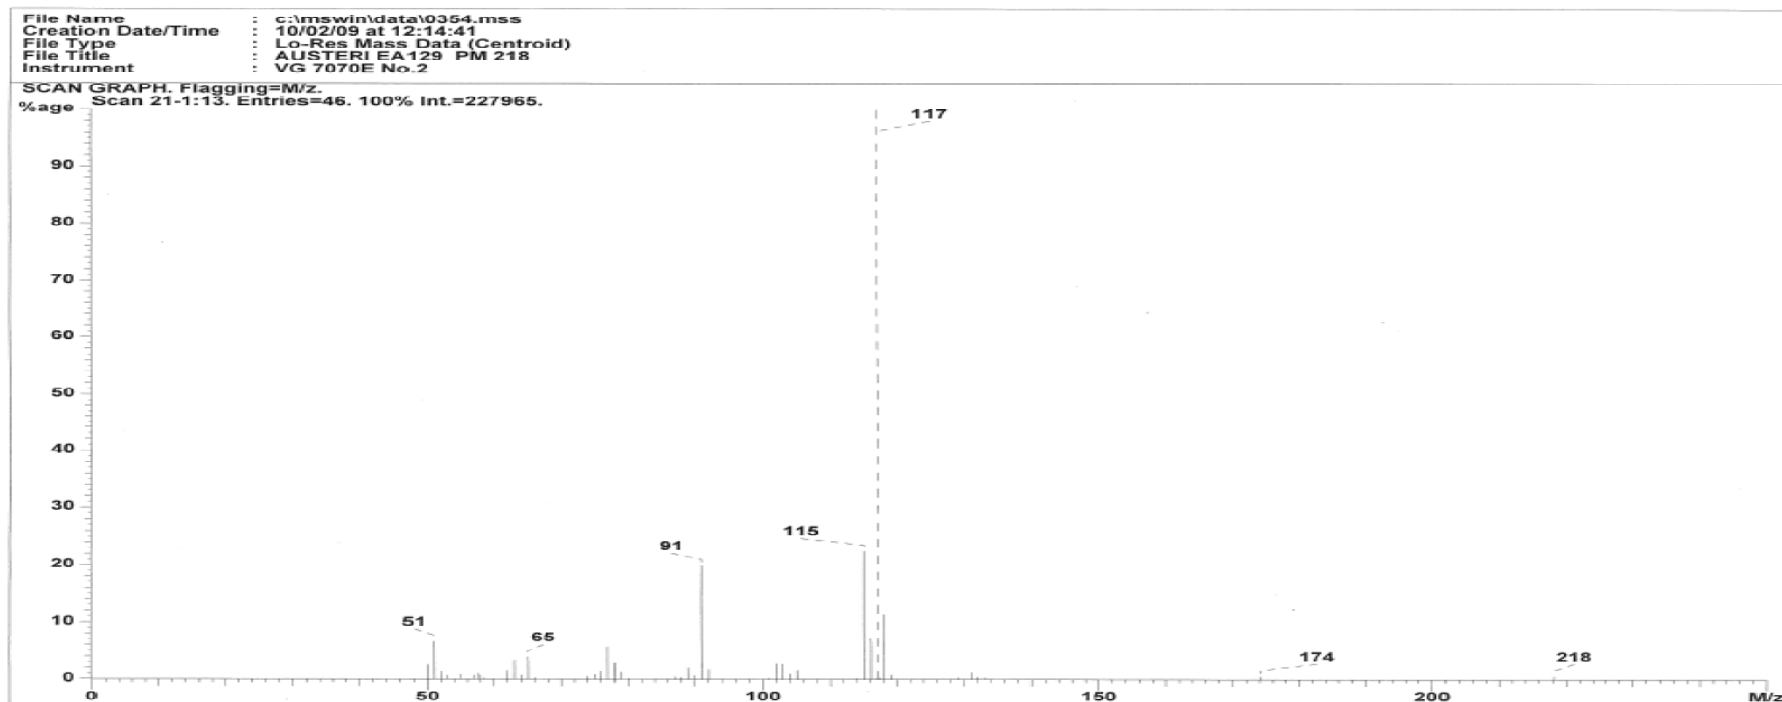



# GCMS trace and mass spectrum of **6**

(HP 5 MS: T<sub>inj</sub> 250 °C, P = 0.48 bar; 60 °C, isotherm 5 min then temperature gradient 10 °C.min<sup>-1</sup> until 320 °C, isotherm 5 min)

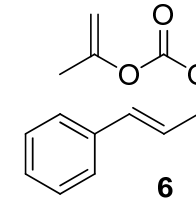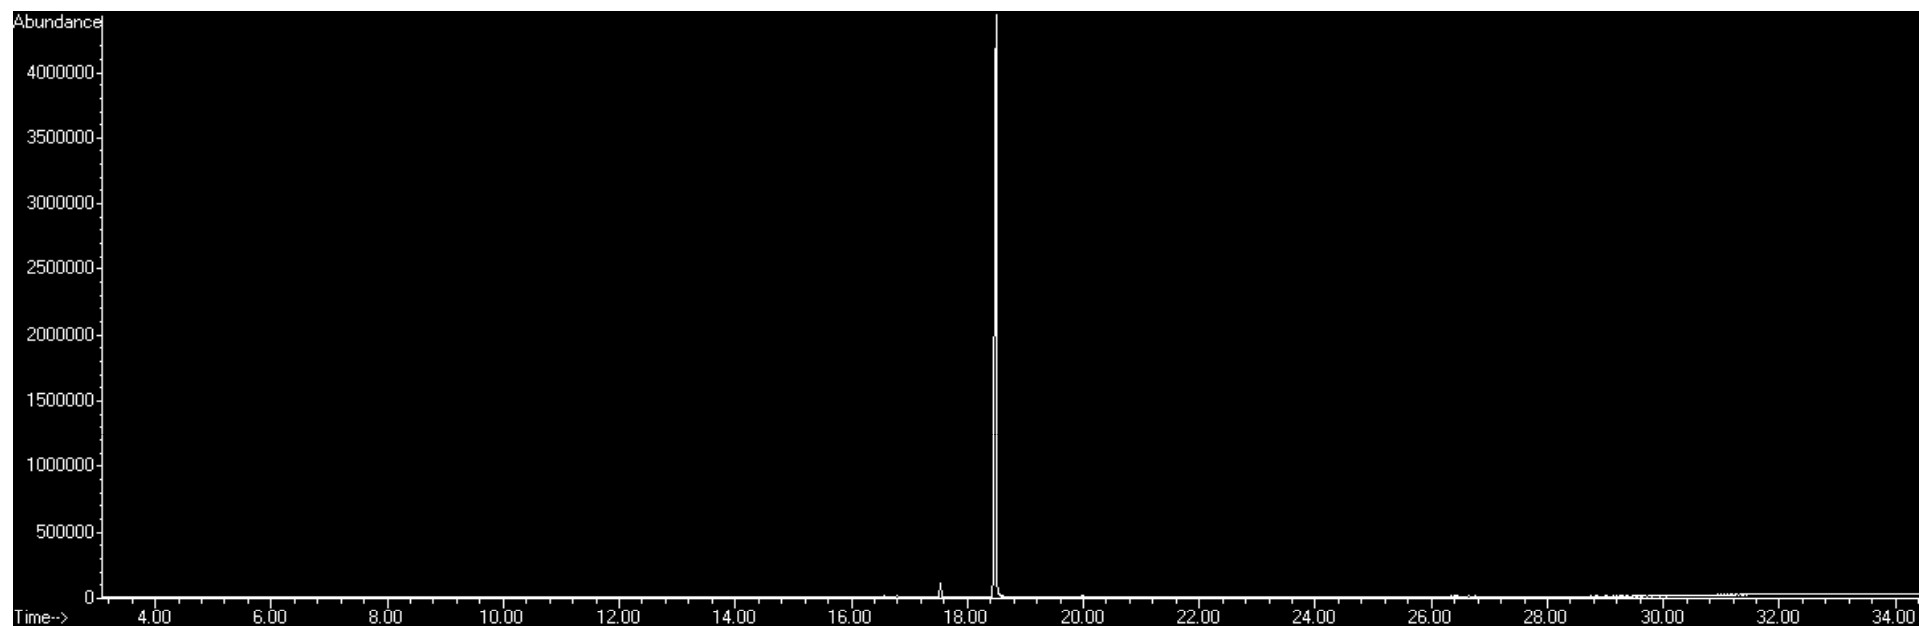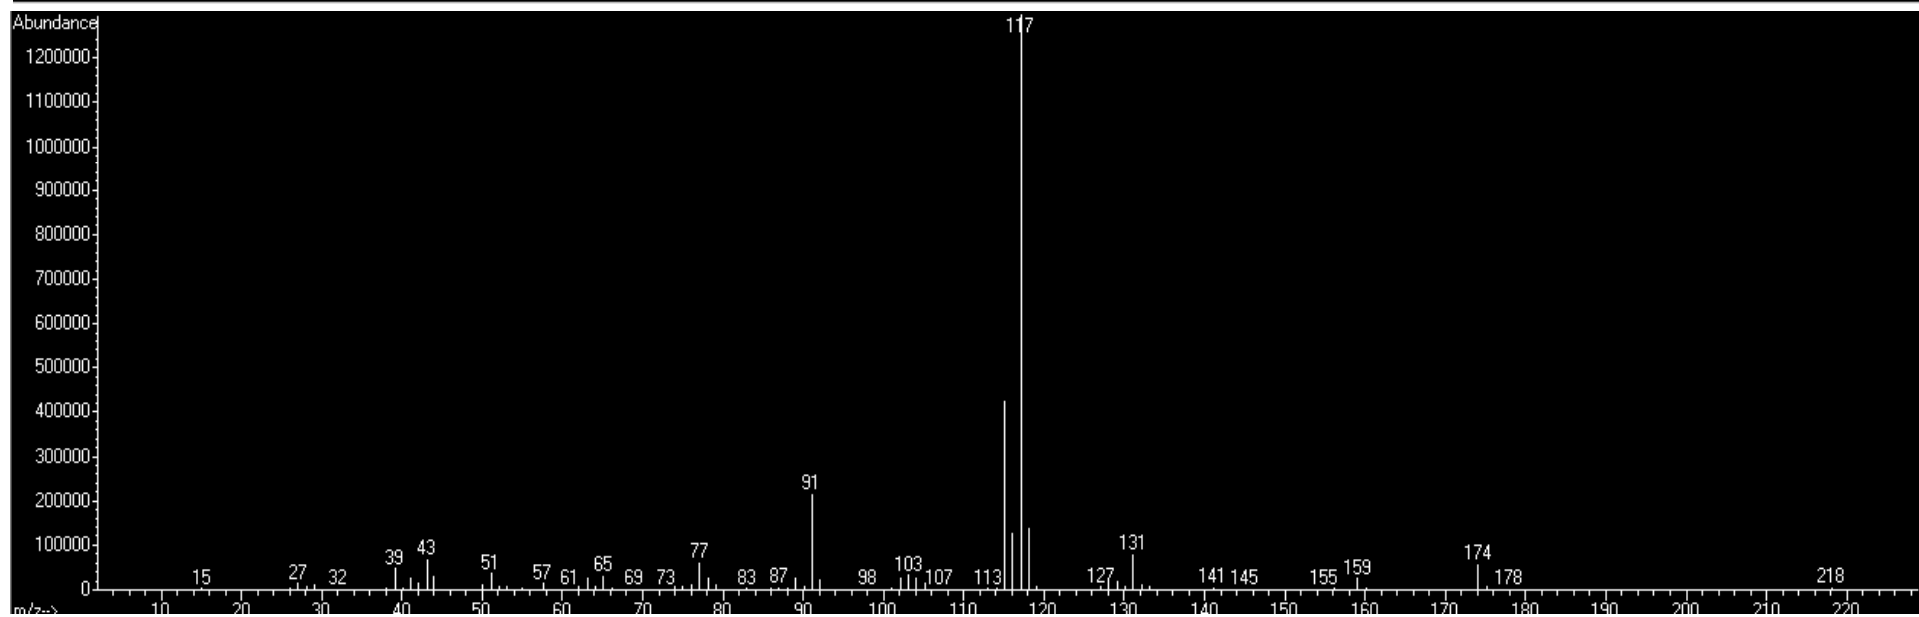

<sup>1</sup>H NMR spectrum of **7** (400 MHz, CDCl<sub>3</sub>)

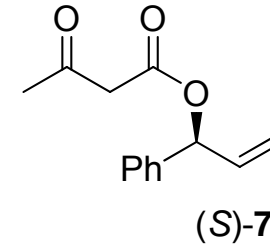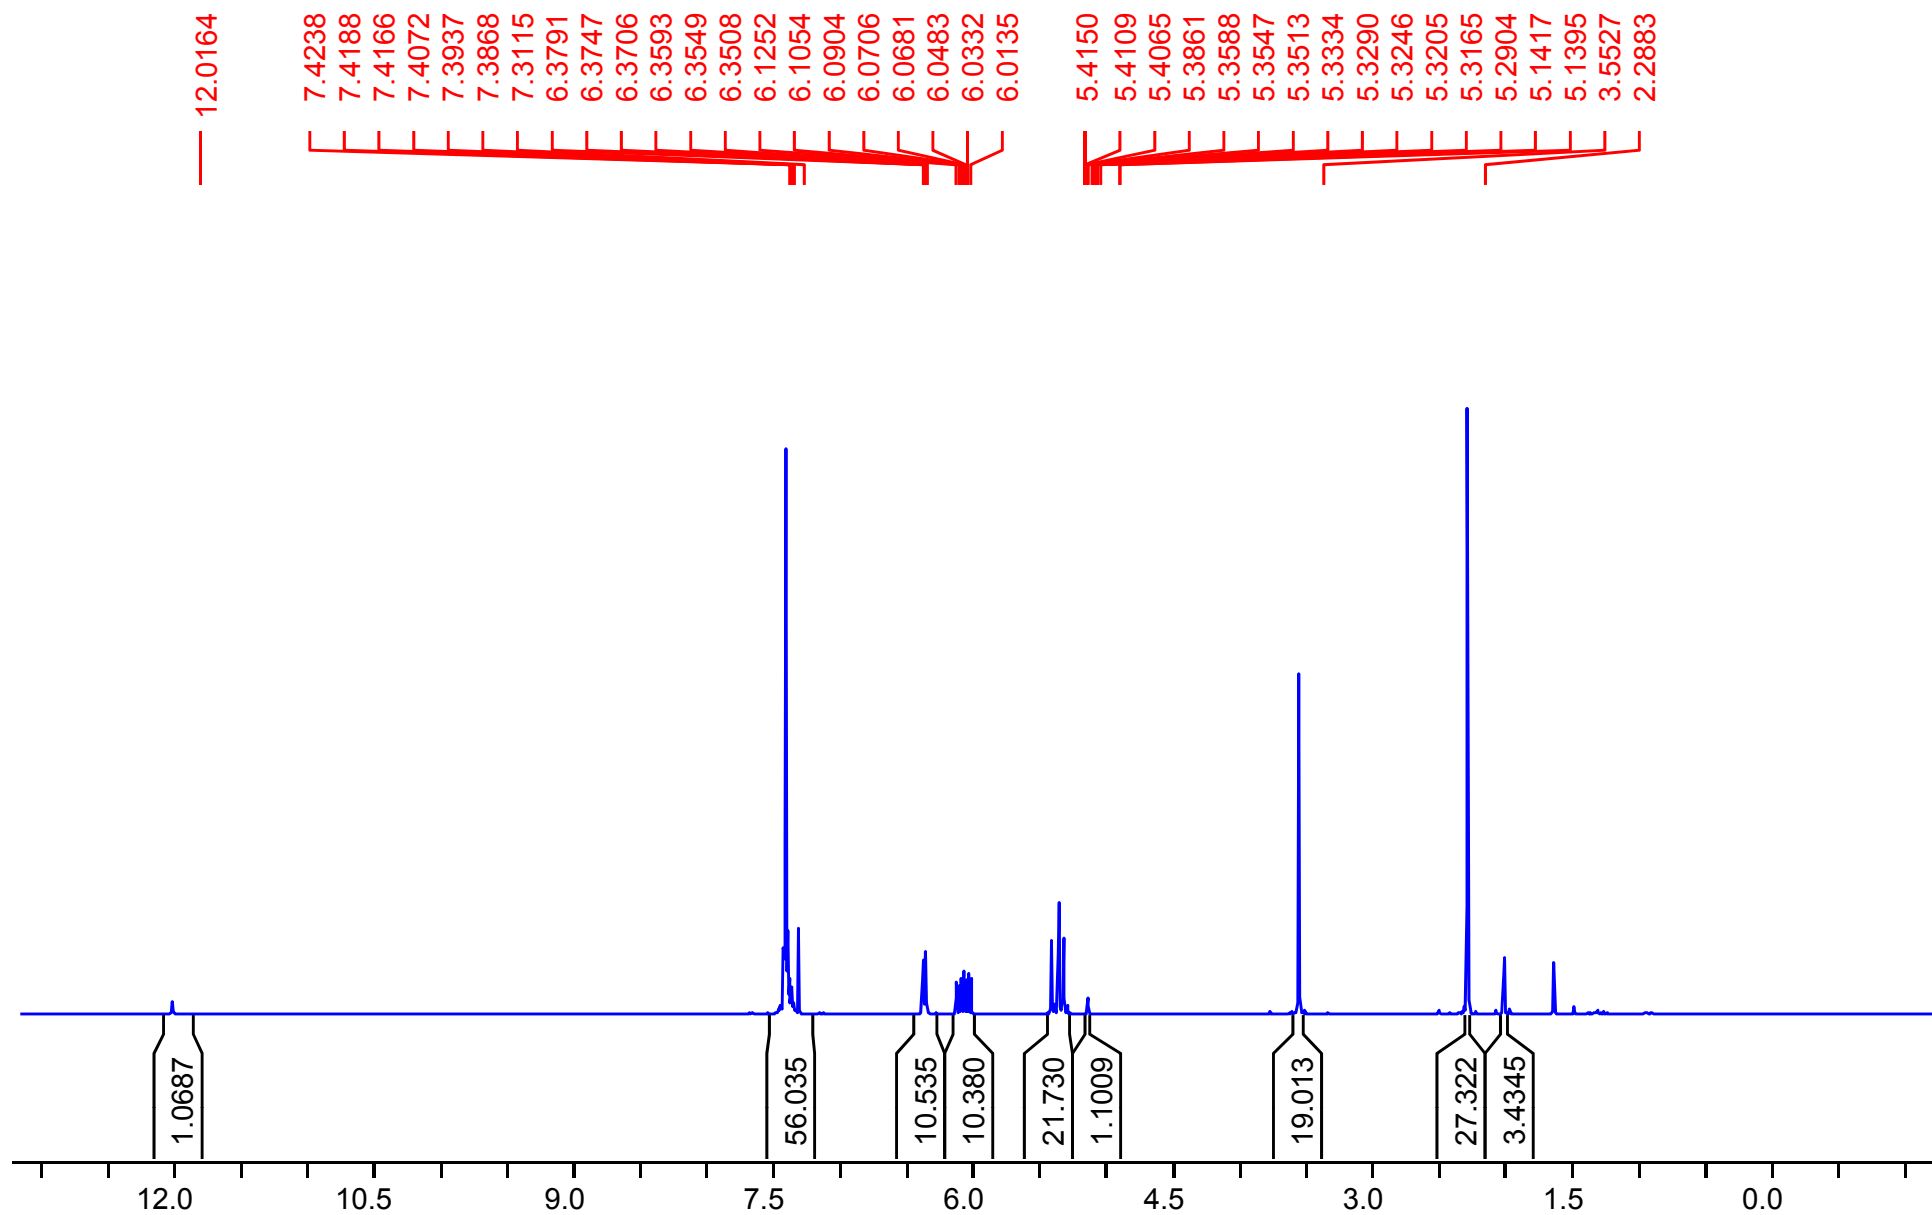

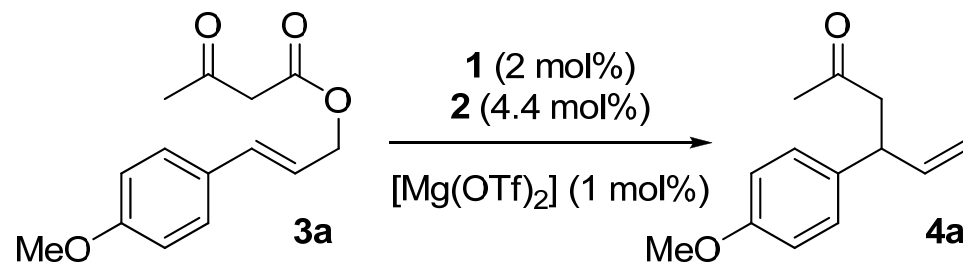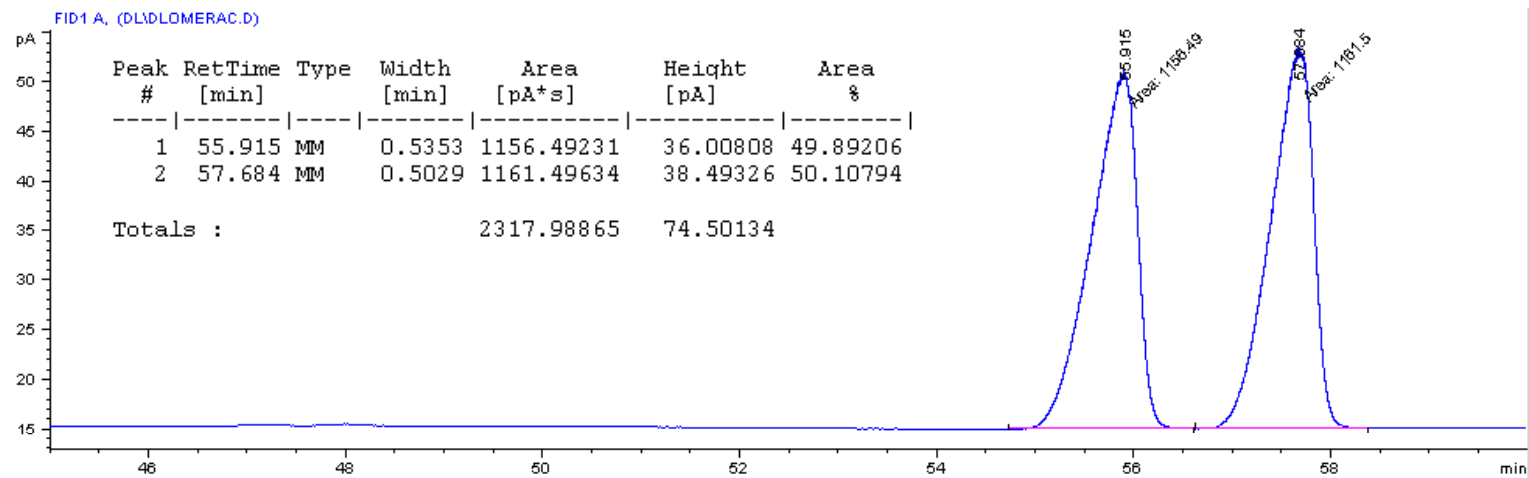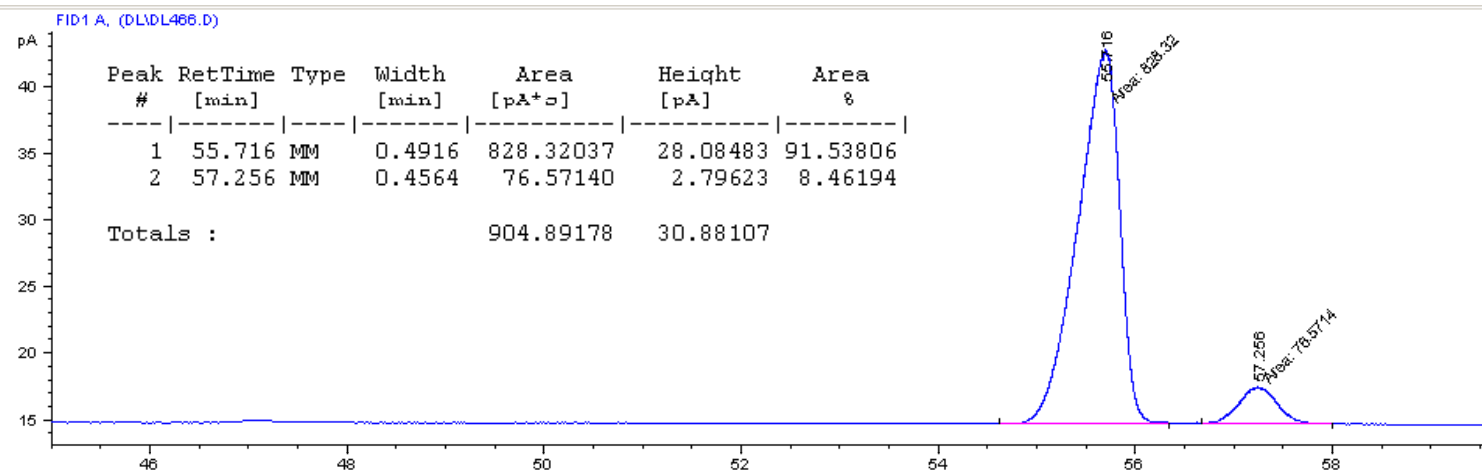

Determined by CSP-GC (Chiraldex Hydrodex  $\beta$ -3P),  $T_{inj}$  250 °C, P = 0.596 bar; 130 °C, isotherm.

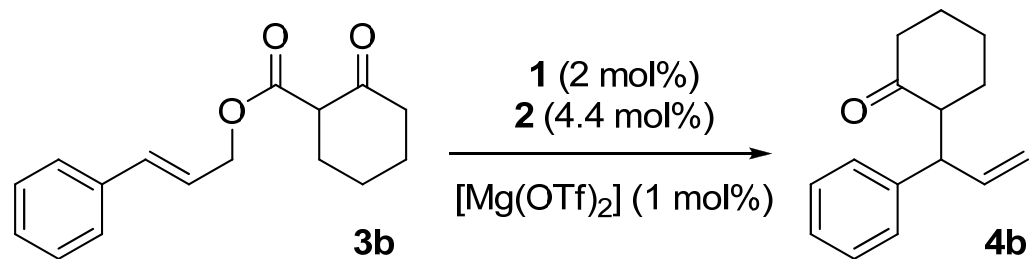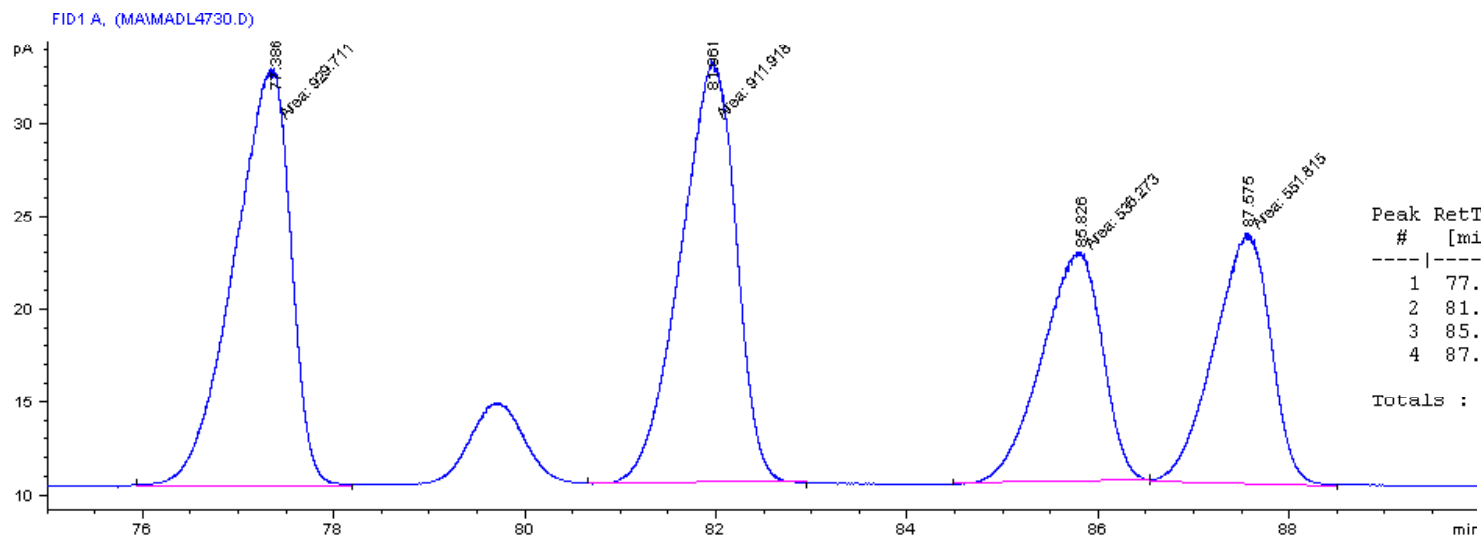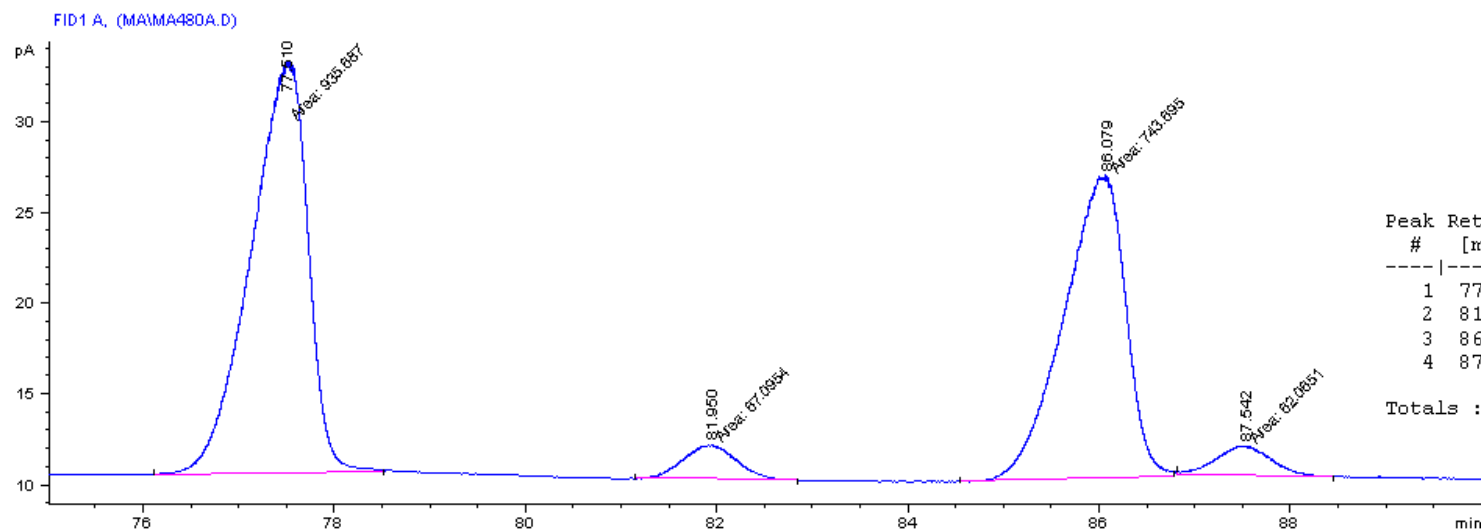

Determined by CSP-GC (Chiraldex Hydrodex  $\beta$ -3P),  $T_{inj}$  250 °C, P = 0.596 bar; 130 °C, isotherm.

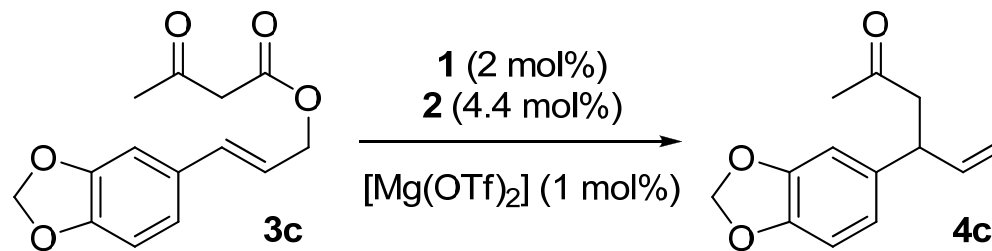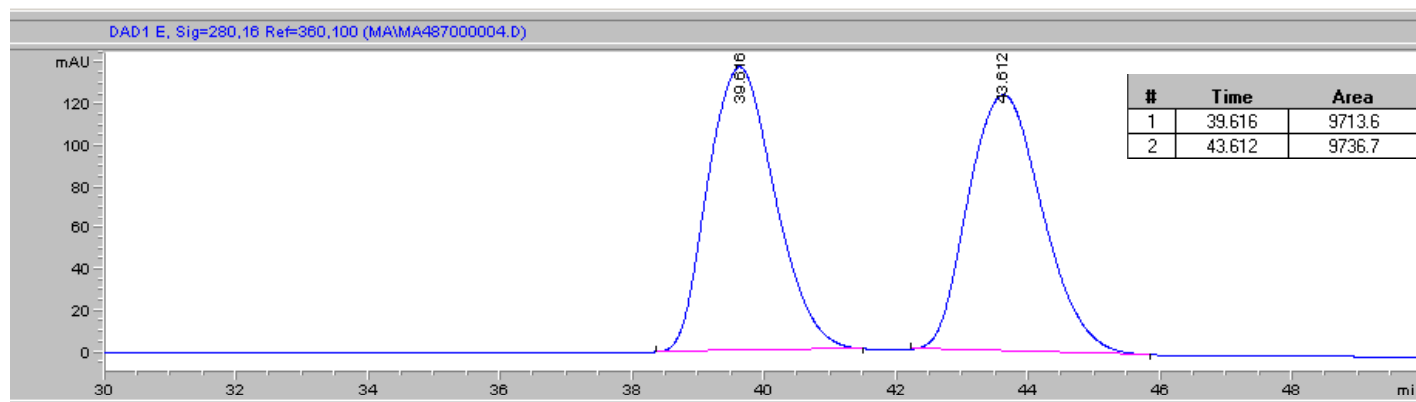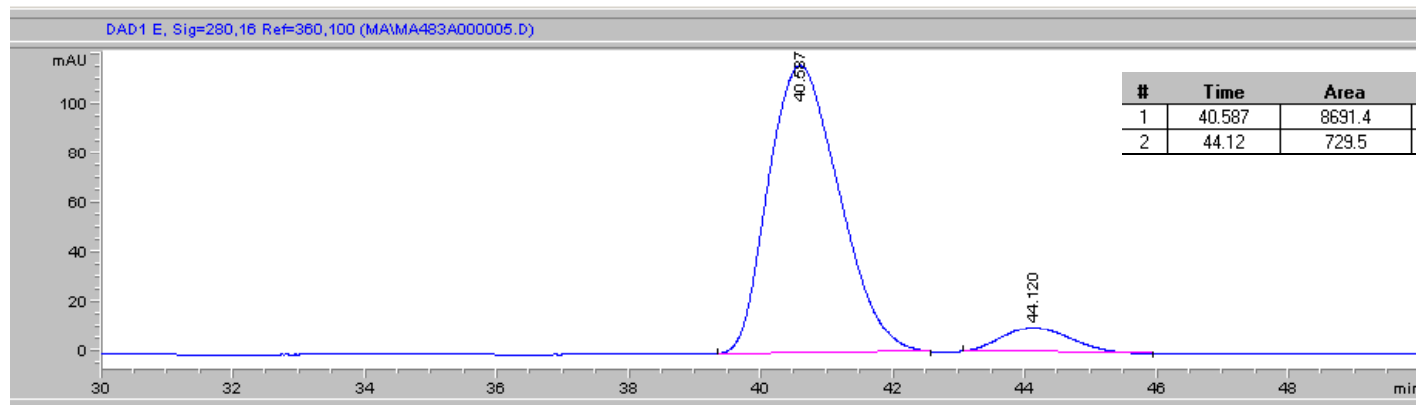

Determined by CSP-HPLC Column OD-H Hex/i-PrOH 99.5/0.5 flow 0.5 mL/min, 23 °C

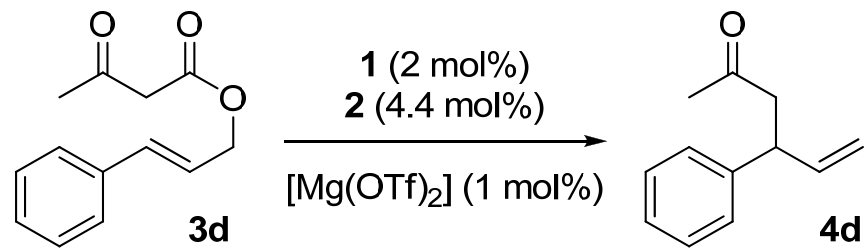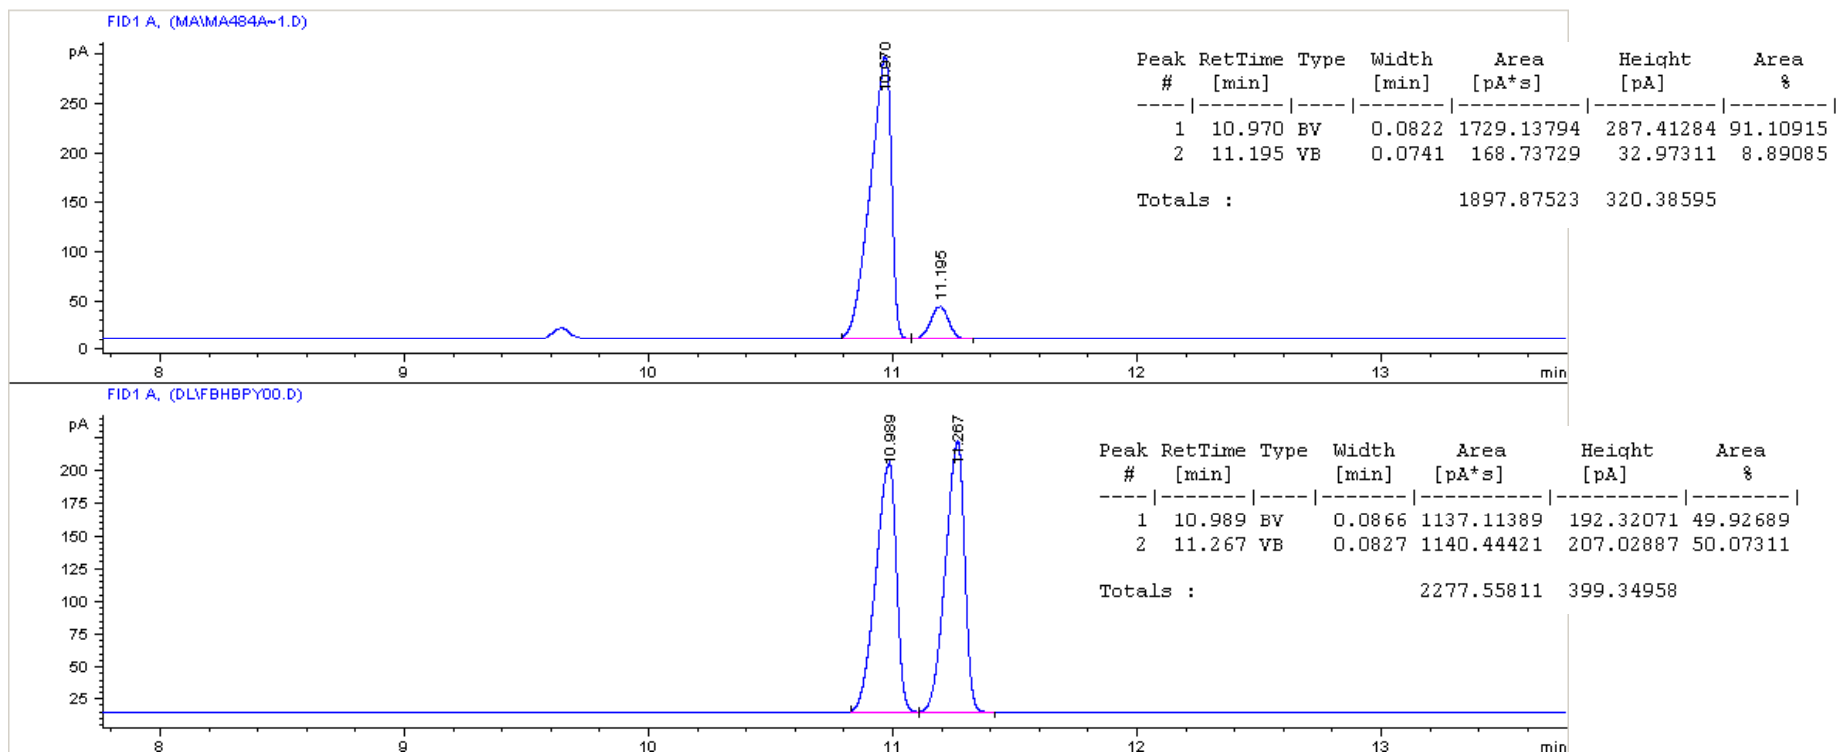

Determined by CSP-GC (Chiraldex Hydrodex  $\beta$ -3P),  $T_{inj}$  250 °C, P = 0.596 bar; 130 °C, isotherm.

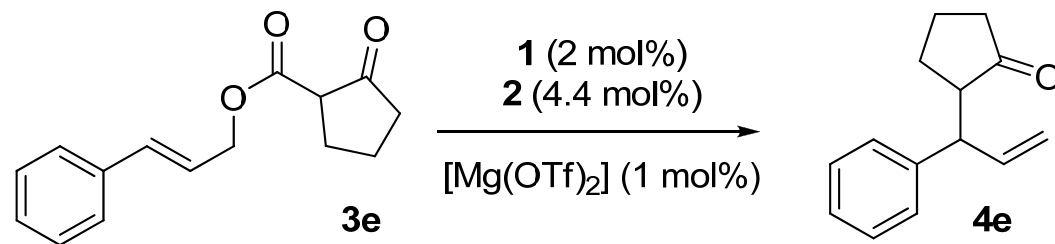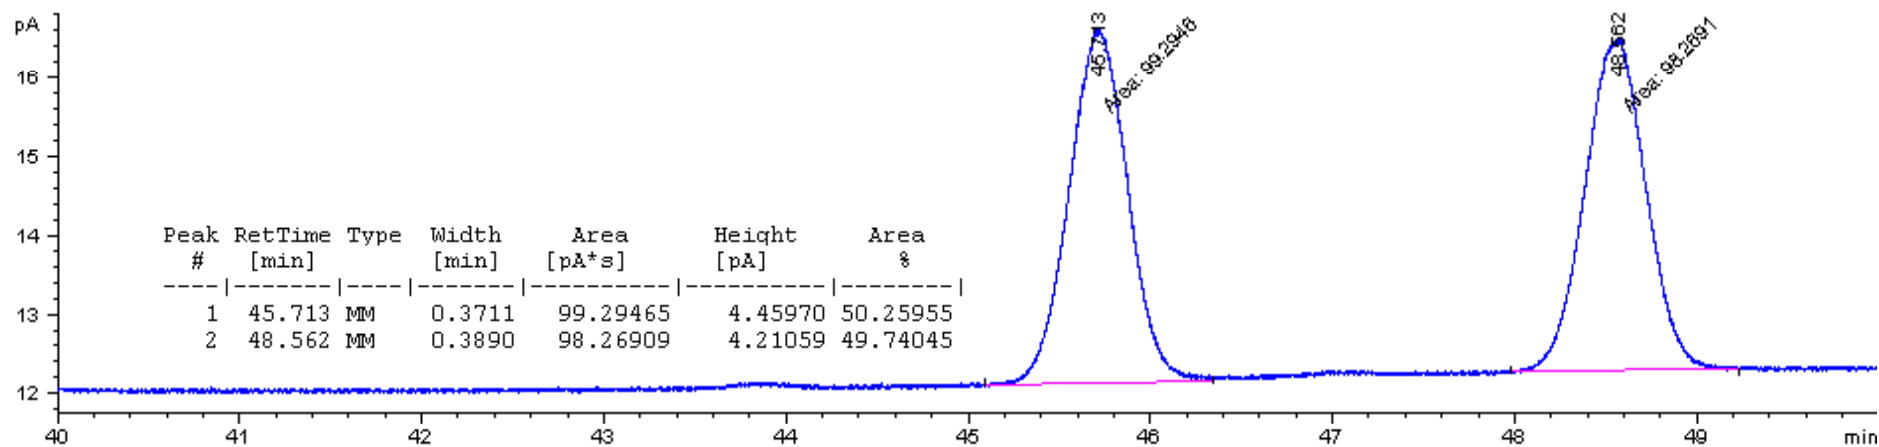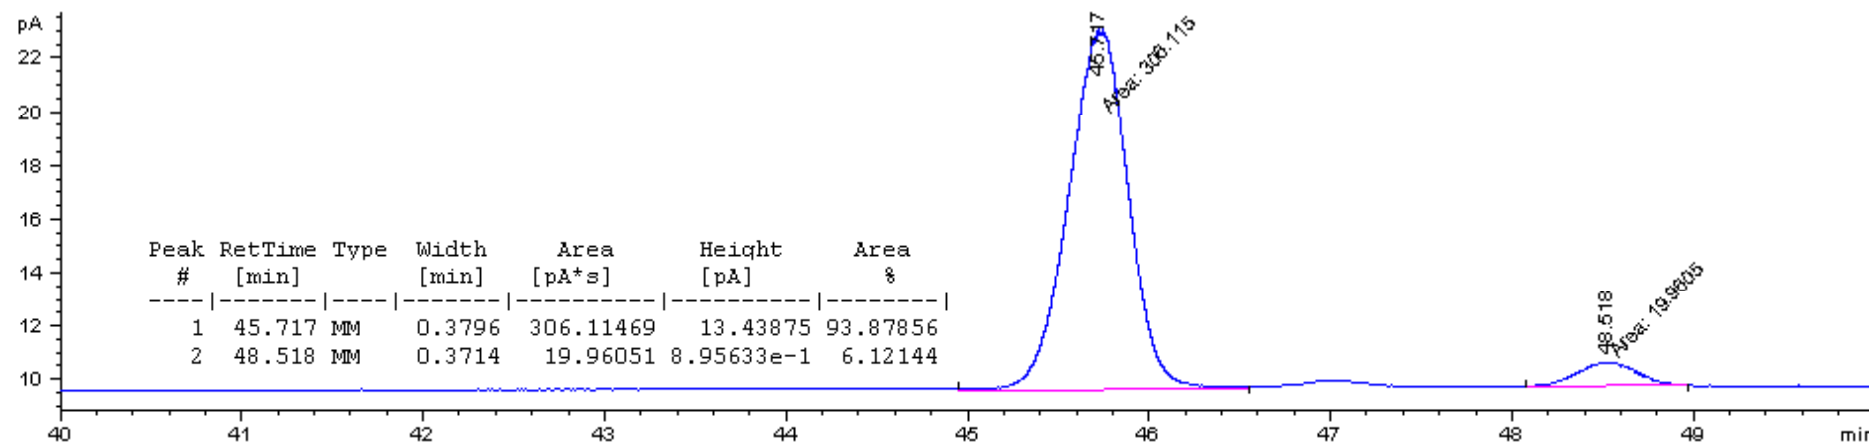

Determined by CSP-GC (Chiraldex Hydrodex  $\beta$ -3P),  $T_{inj}$  250 °C, P = 0.596 bar; 130 °C, isotherm.

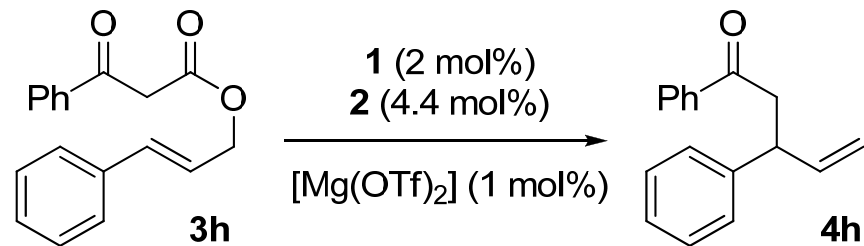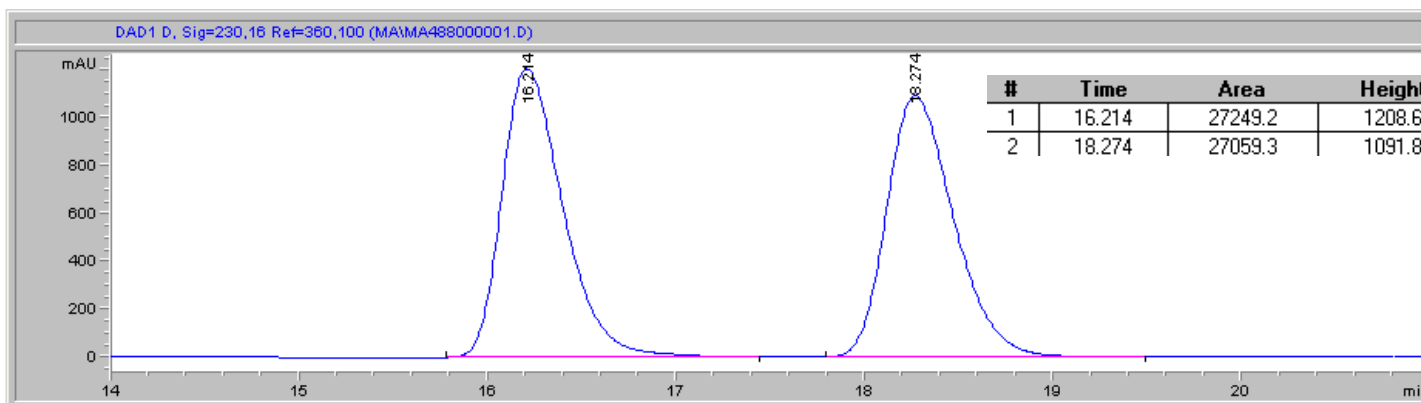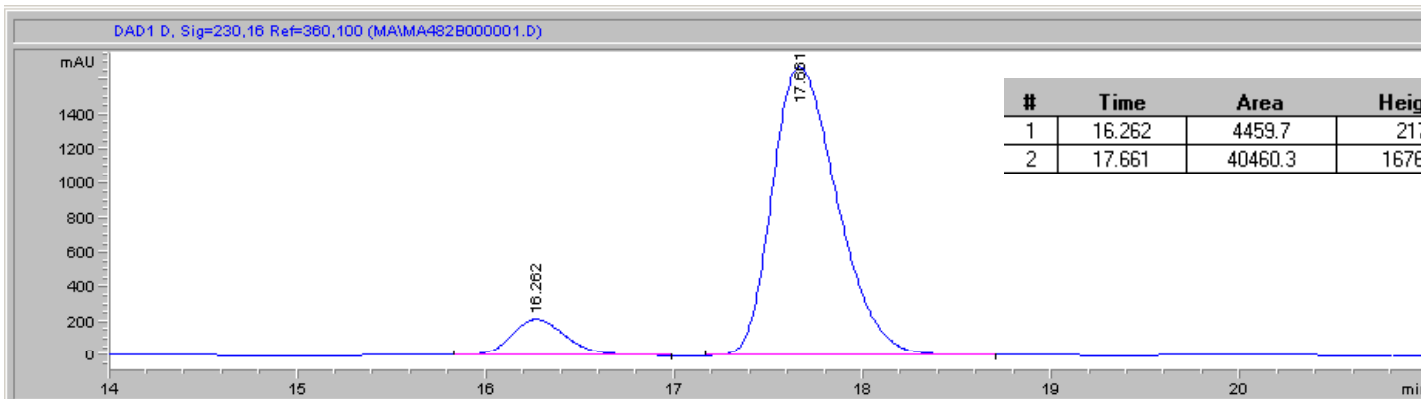

Determined by CSP-HPLC Column OD-H Hex/i-PrOH 98/2 flow 0.5 mL/min, 23 °C



# Racemic and enantiopure secondary ester 7

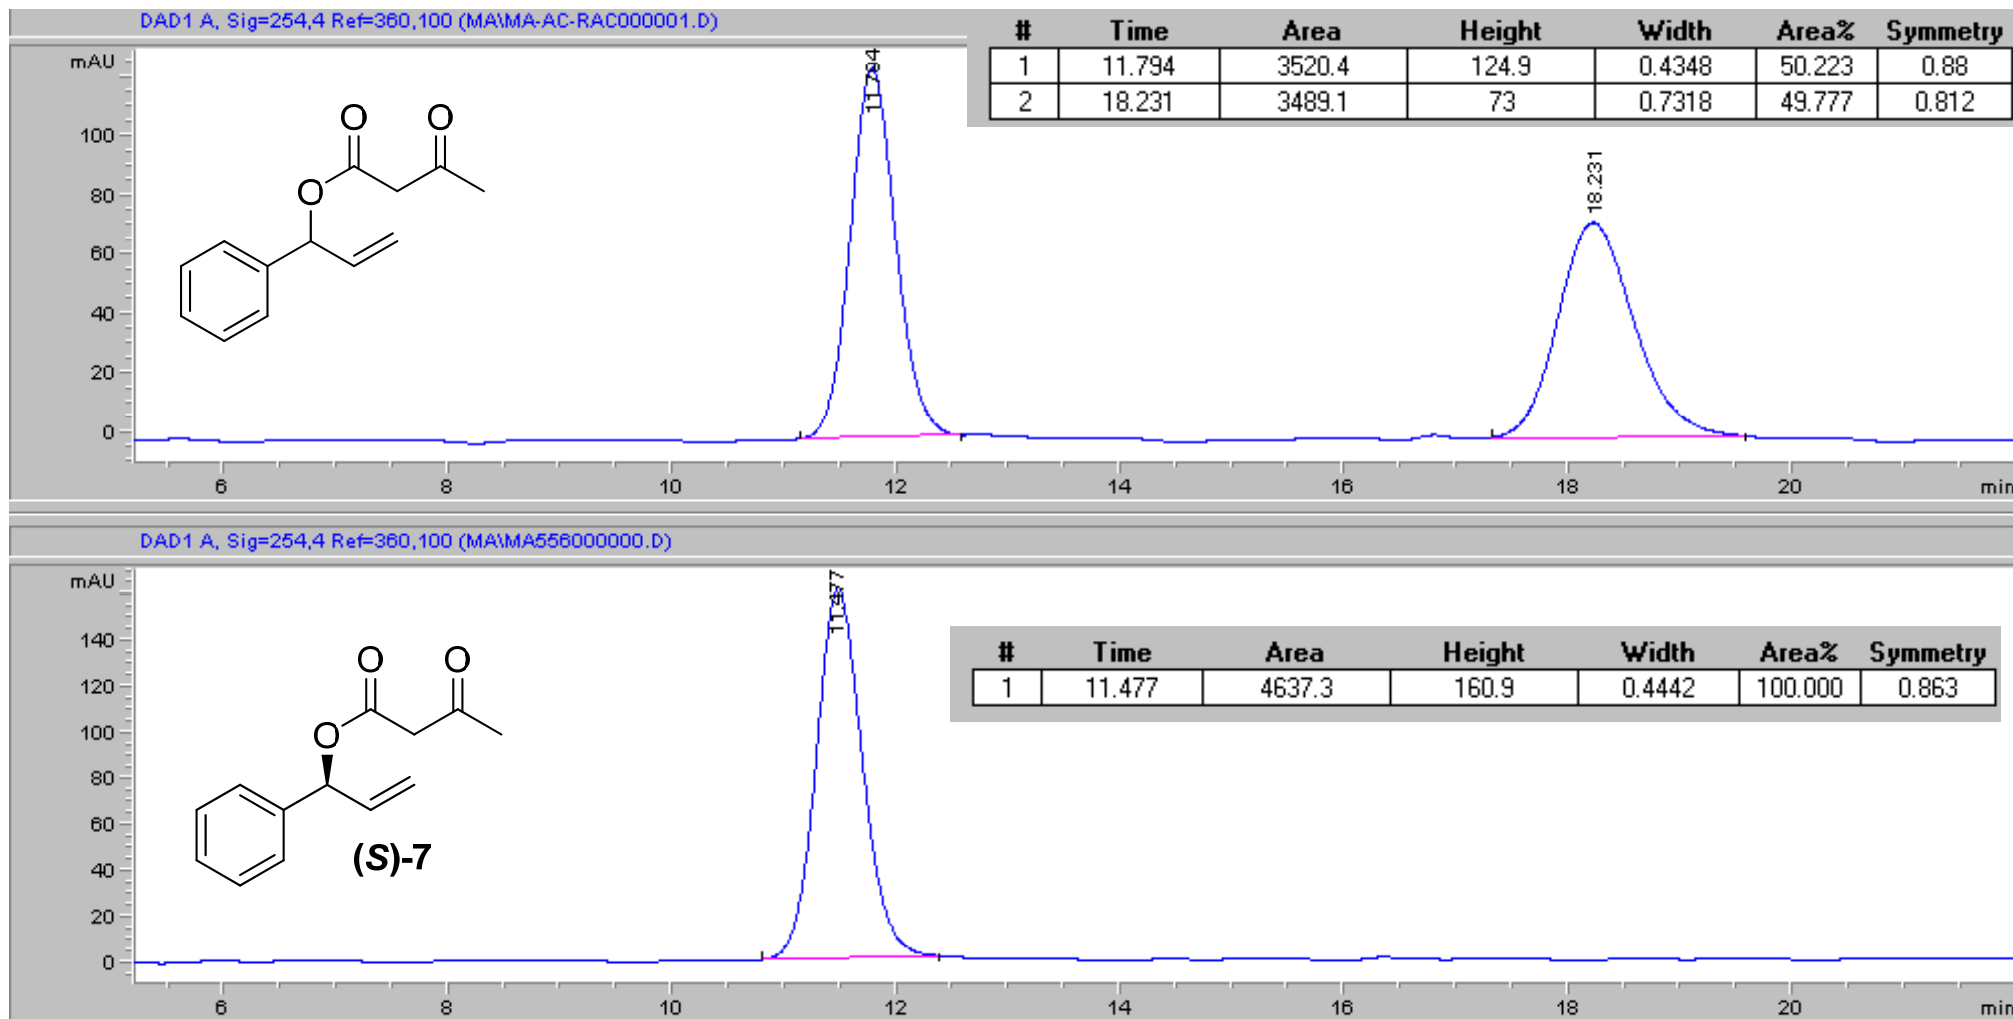

Determined by CSP-HPLC Column Whelk-O1 Hex/i-PrOH 99/1 flow 1 mL/min, 23 °C

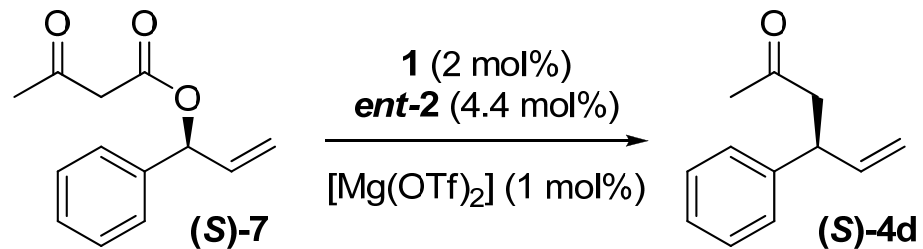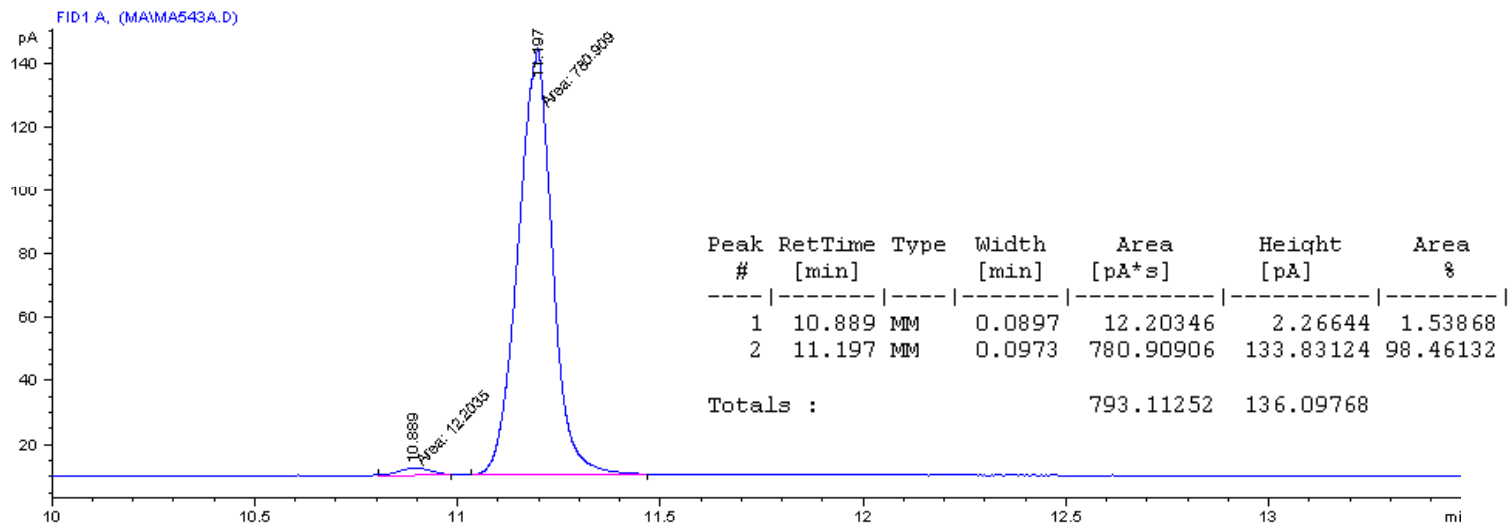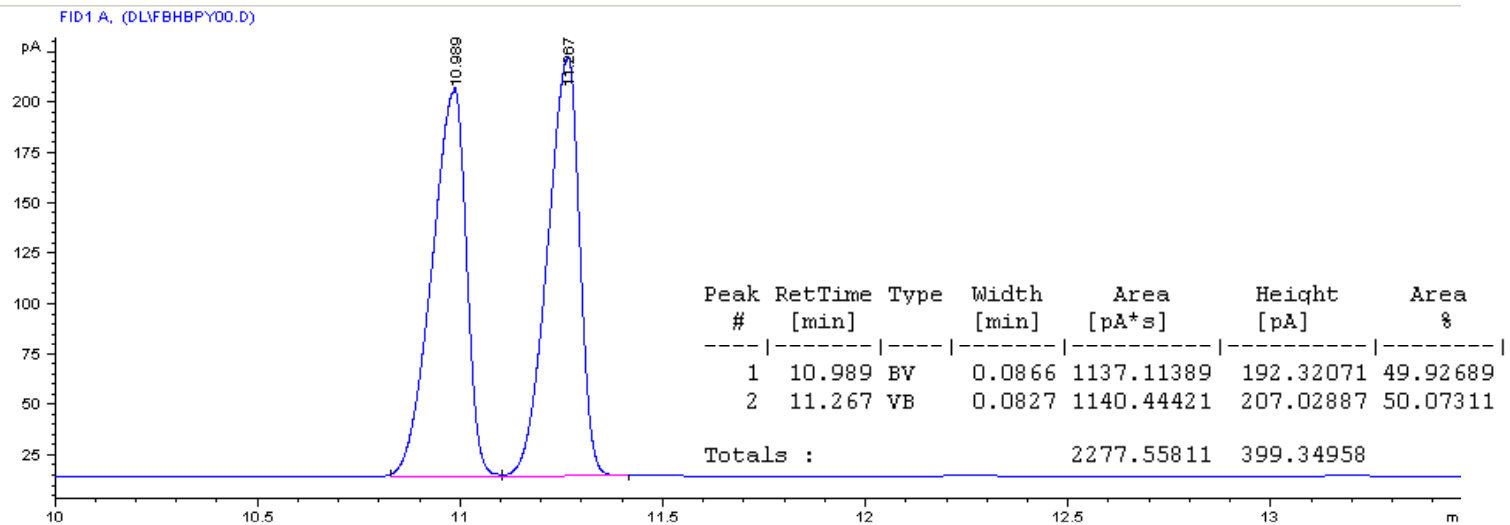

Determined by CSP-GC (Chiraldex Hydrodex β-3P), T<sub>inj</sub> 250 °C, P = 0.596 bar; 130 °C, isotherm.
